# Supplementary material
Source: PubMed Central journal article supplement (PMC4174095)
Supplement: nn503513p_si_001.pdf [file nn503513p_si_001.pdf]

# Addressing the Instability of DNA Nanostructures in Tissue Culture

## Authors

*Jaeseung Hahn<sup>1,2,3,4</sup>, Shelley F.J. Wickham<sup>2,3,4</sup>, William M. Shih<sup>2,3,4</sup>, Steven D. Perrault<sup>2,3,4\*</sup>*

<sup>1</sup>Harvard–Massachusetts Institute of Technology (MIT) Division of Health Sciences and Technology, MIT, Cambridge, MA 02139, USA.

<sup>2</sup>Department of Cancer Biology, Dana Farber Cancer Institute, Boston, MA, 02115, USA.

<sup>3</sup>Wyss Institute for Biologically Inspired Engineering, Harvard Medical School, Boston, MA, 02115, USA.

<sup>4</sup>Biological Chemistry and Molecular Pharmacology, Harvard Medical School, Boston, MA, 02115, USA.

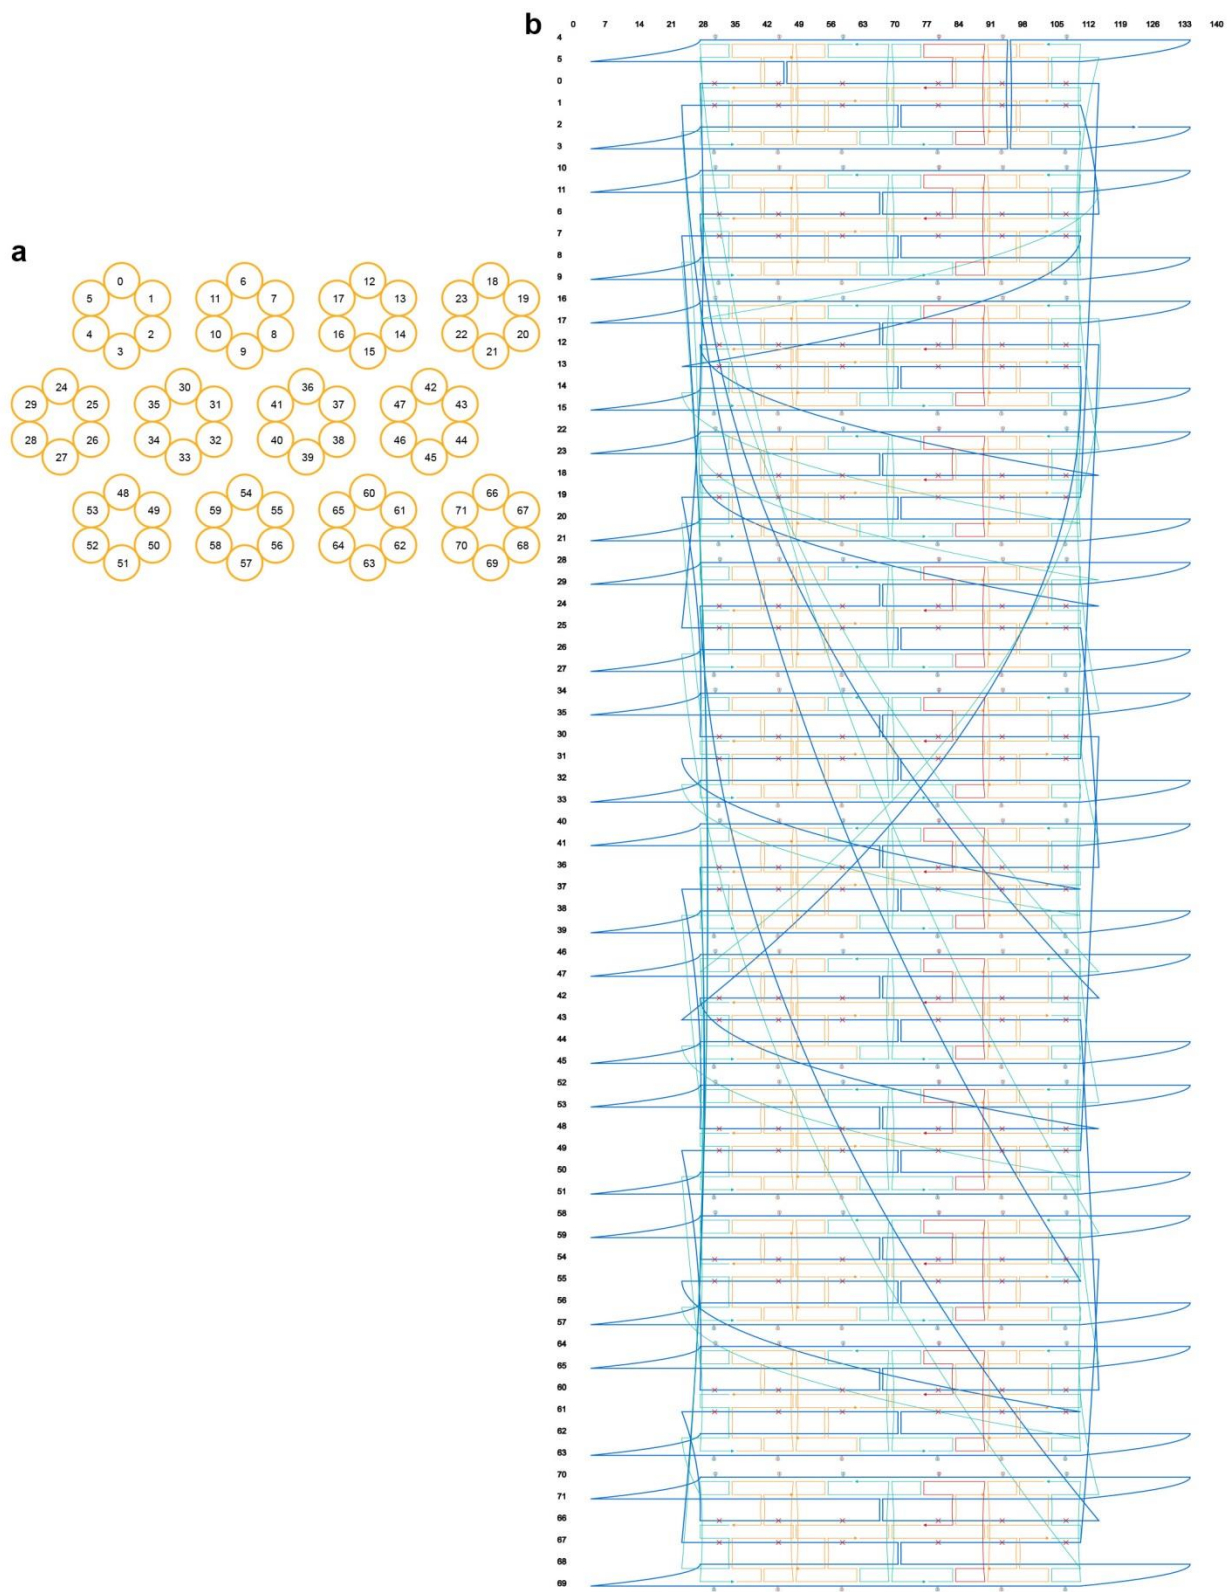

**Supporting Information Fig. 1. Schematic of the DNO design and scaffold routing. (a)** Organization of helices into six-helix bundles for the 12 struts. **(b)** Scaffold and staple strand organization.

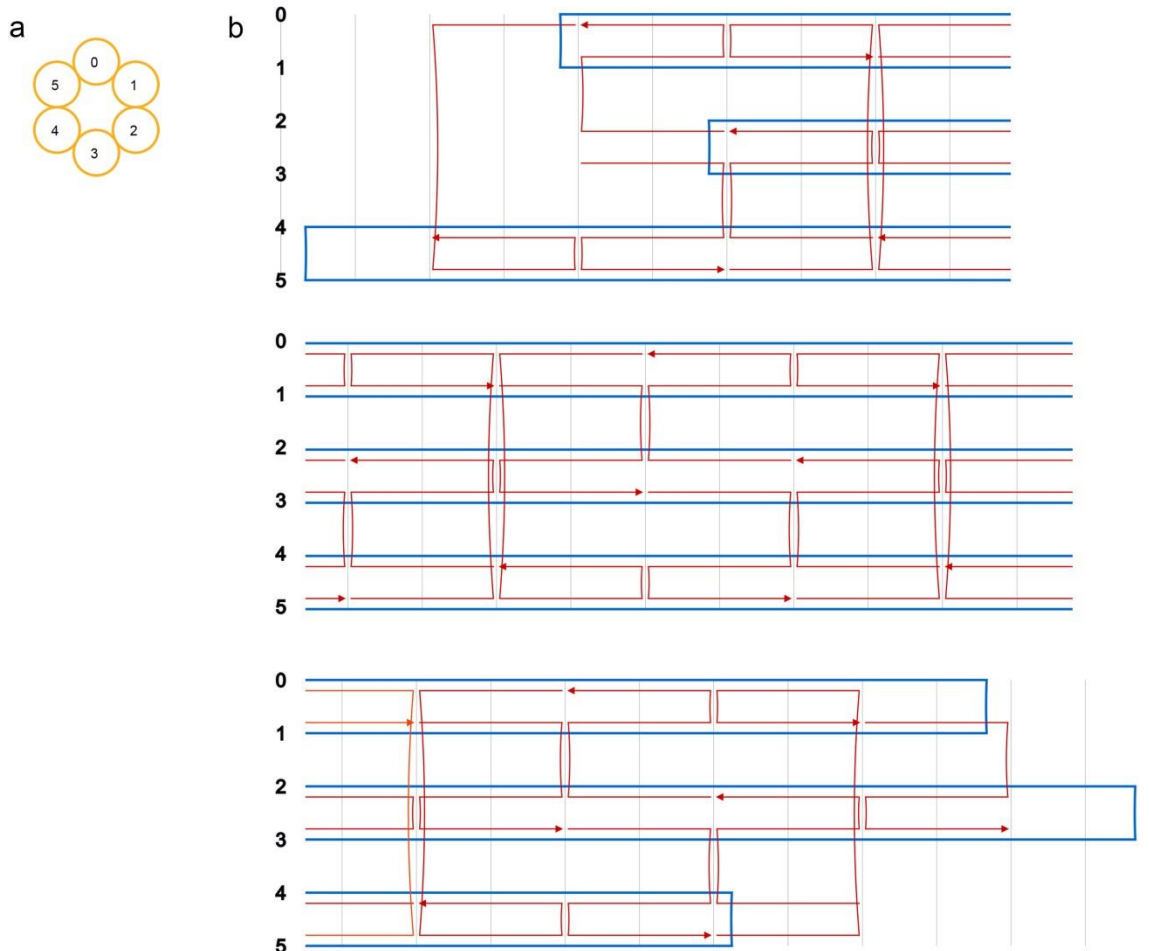

**Supporting Information Fig. 2. Schematic of the NT design and scaffold routing.** (a) Organization of helices into the six-helix bundle. (b) Representative scaffold and staple strand organization at the left (top), center (middle) and right (bottom) of the nanostructure. Note that the staple organization is repeated across the entire nanostructure length.

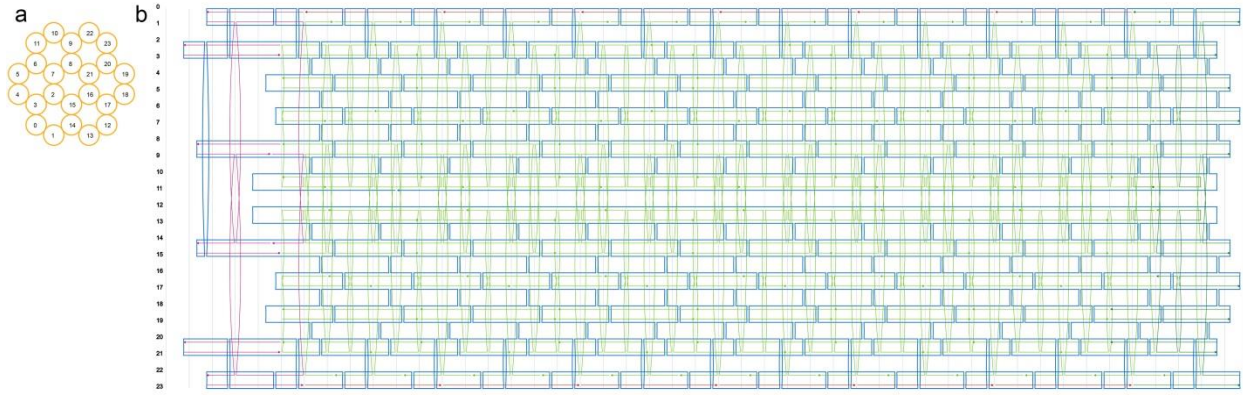

**Supporting Information Fig. 3. Schematic of the NR design and scaffold routing.** (a) Scaffold and staple strand organization. (b) Organization of helices into the 24-helix architecture.

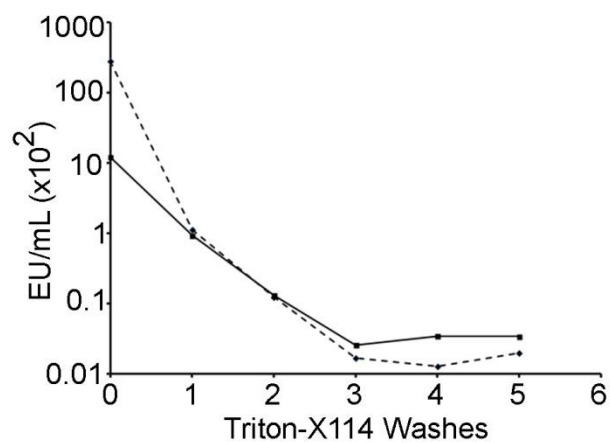

**Supporting Information Fig. S4. Removal of endotoxin from M13 scaffold stock and DNO nanostructure.** Endotoxin was removed from a 500 nM M13 single-stranded DNA stock (—), and a 10 nM DNO sample (- - -) using 5x sequentially scrubs with Triton X-114. Endotoxin levels were reduced to a maximum of 5 EU/mL in scaffold stocks prior to synthesis and purification of nanostructures.

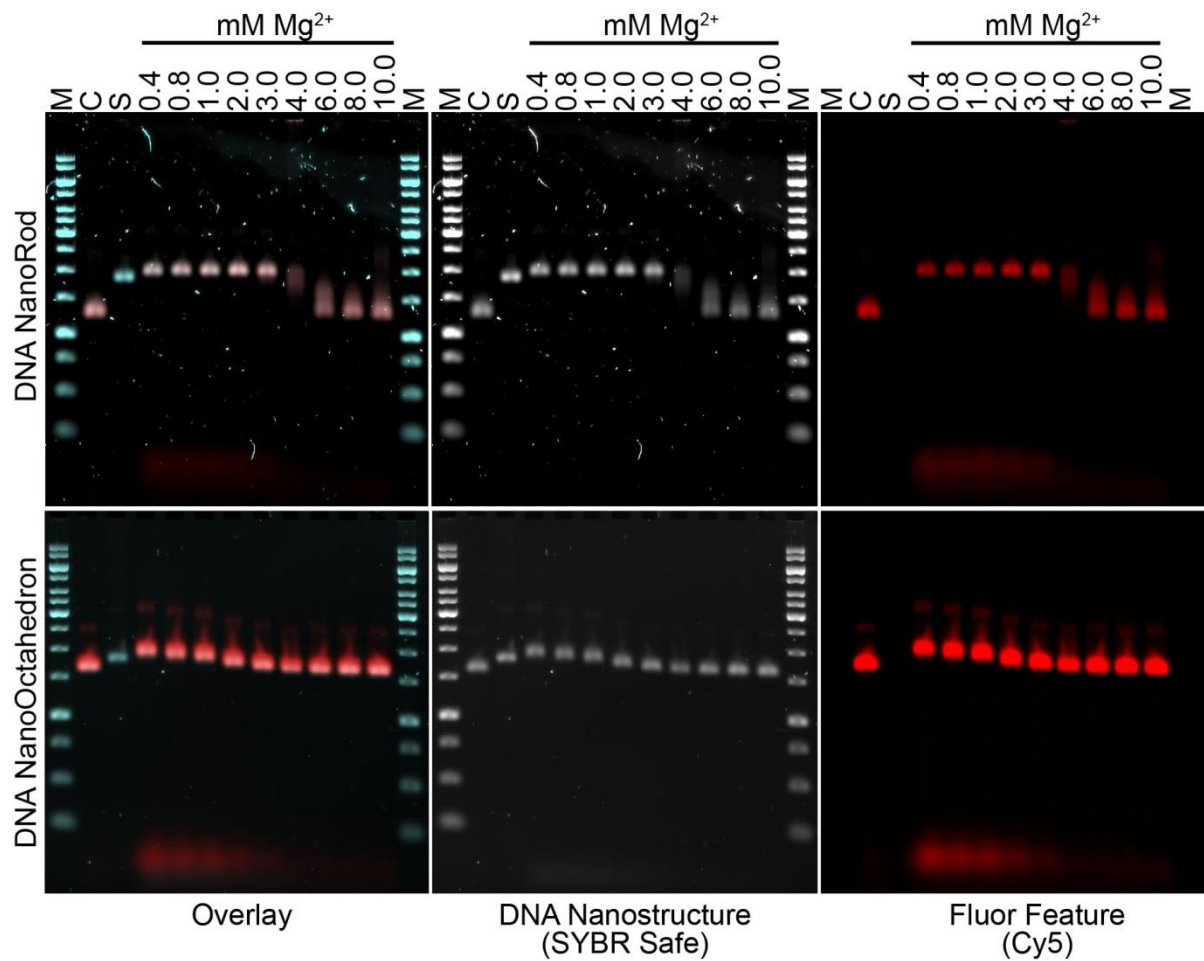

**Supporting Information Fig. 5. Nanostructure loss of molecular cargo during denaturation in RPMI media.** A fluorescent Cy5-oligonucleotide feature (5'-GTGAGTTGTGGTAGATAATTT-3') was annealed to the DNO and NR and the products purified. These were then incubated in standard or  $Mg^{2+}$  adjusted RPMI media at 37°C for 24 hrs, and the products analyzed by AGE. Imaging of the gel in SYBR Safe and Cy5-fluorescence channels show a partial loss of the Cy5-labeled feature after incubation at  $Mg^{2+}$  concentrations below ~6 mM.

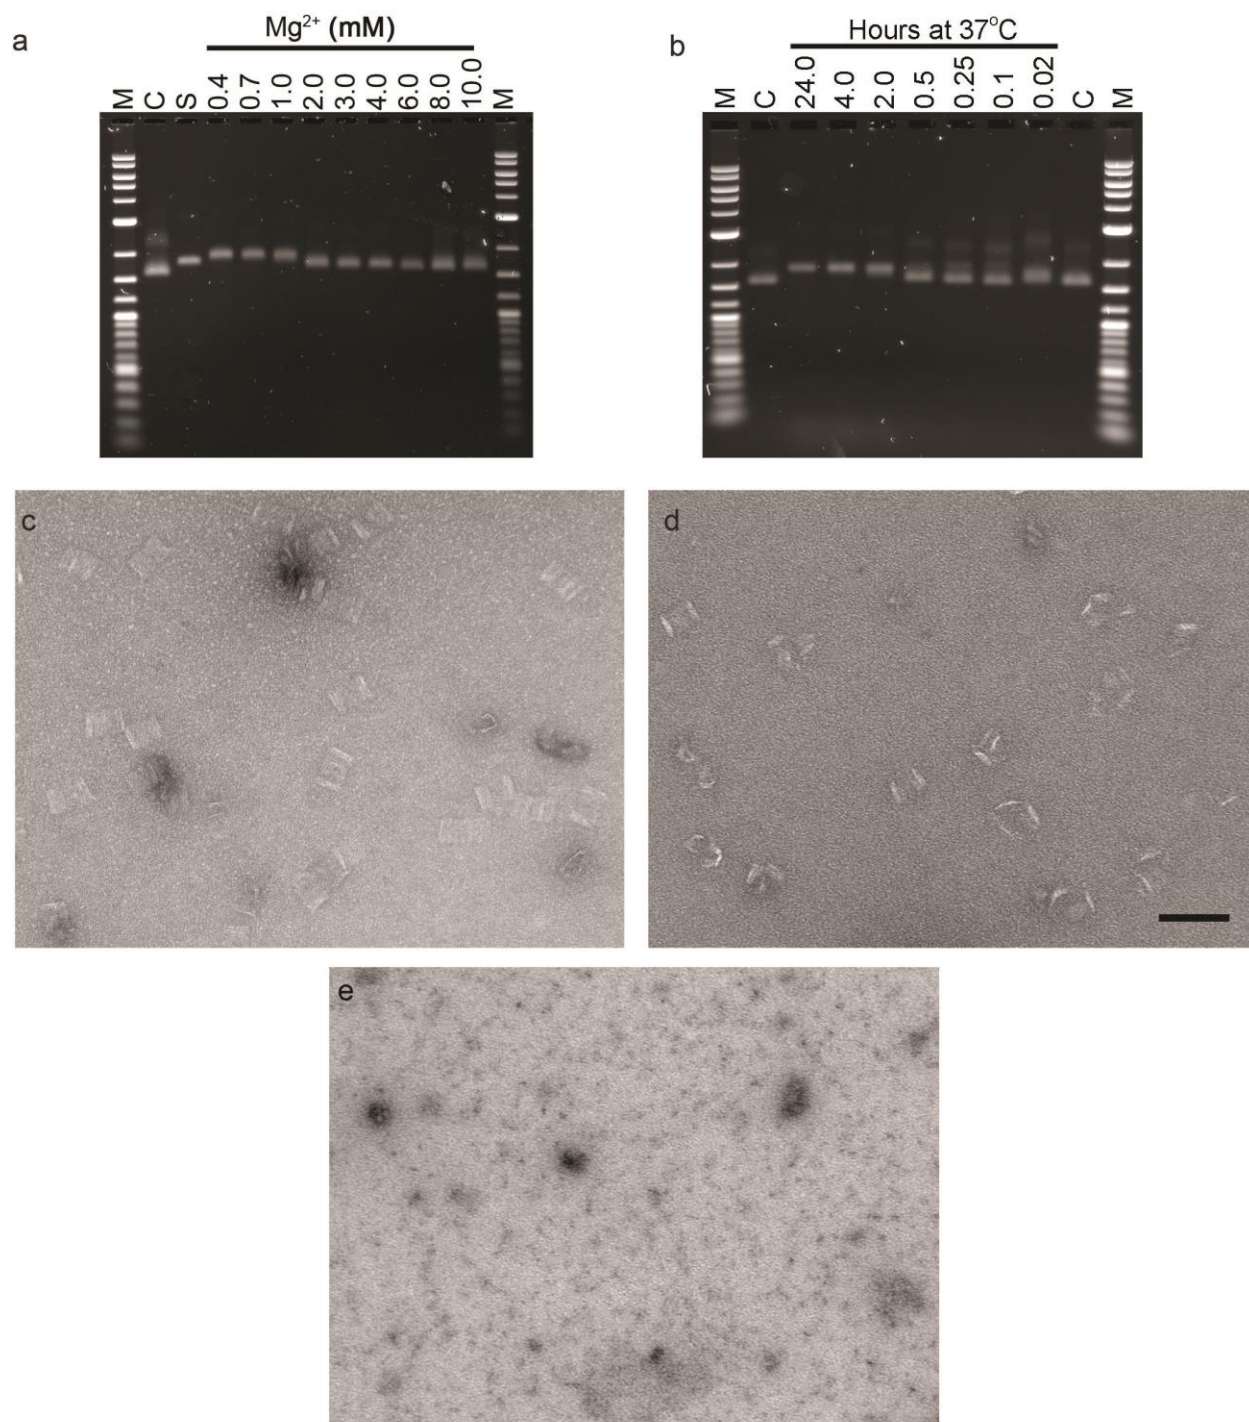

**Supporting Information Fig. 6. Sensitivity of the DNA nanorobot to denaturation in RPMI media.**

**(a)** AGE analysis of the nanorobot after incubation in RPMI media and a range of  $Mg^{2+}$  concentrations for 24 hrs at 37°C. Relative to the controls, there is a shift in migration below ~2 mM  $Mg^{2+}$ . **(b)** This shift was apparent after 0.5 hrs of incubation at 37°C in RPMI media (0.4 mM  $Mg^{2+}$ ). M = molecular weight

ladder, C = RPMI + 6 mM Mg<sup>2+</sup>. (c) TEM imaging of the NanoRobot after incubation in 10 mM, and (d) 2 mM Mg<sup>2+</sup>. In comparison to the 10 mM Mg<sup>2+</sup> sample, those incubated at 2 mM have a stressed morphology, but were largely intact. (e) After incubation in standard RPMI with 0.4 mM Mg<sup>2+</sup>, no intact nanostructures were visible. Scale bar = 100 nm.



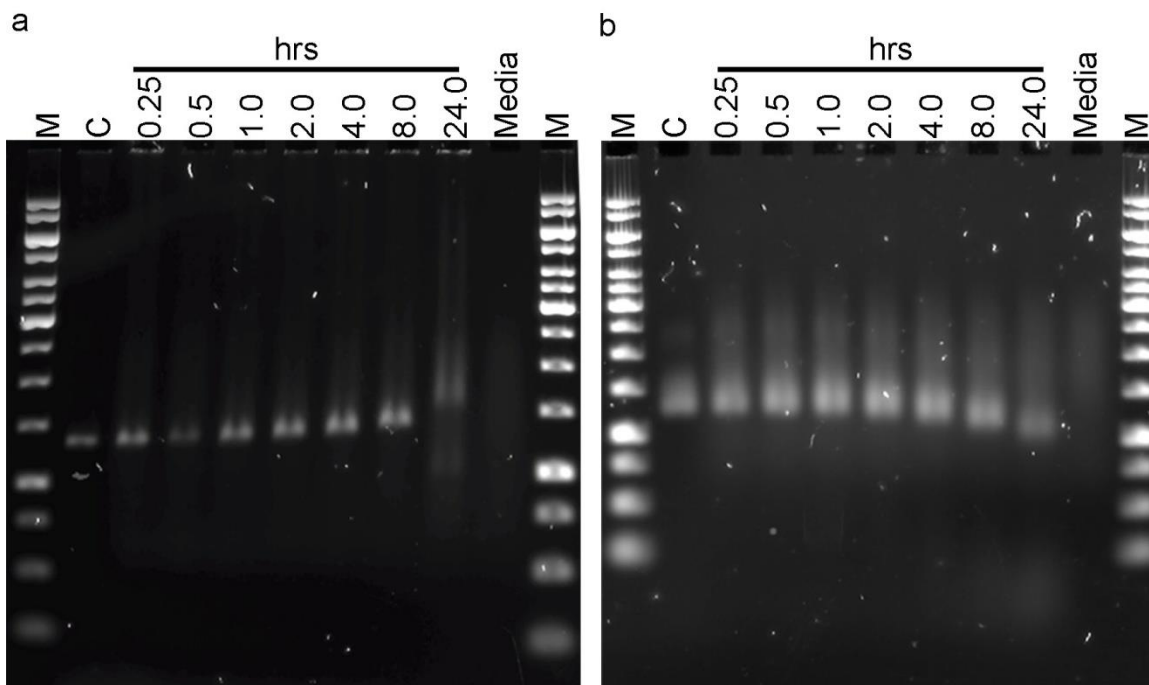

**Supporting Information Fig. 7. Time-dependent sensitivity of NT and NR nanostructures to digestion by nucleases in serum.** (a) NT and (b) NR were incubated at 37°C in RPMI + 6 mM Mg<sup>2+</sup> + 10% FBS for 0.25 – 24 hrs, and the products analyzed by AGE. Digestion of the nanostructures is indicated by increased smearing of the product bands. M = molecular weight ladder, C = TE + 10 mM Mg<sup>2+</sup>.

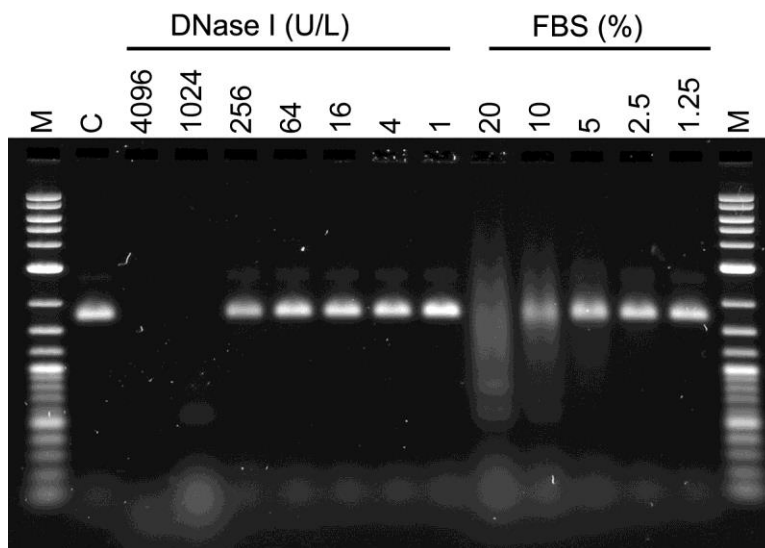

**Supporting Information Fig. 8. Digestion of the DNO nanostructure by DNase I vs RPMI + 6mM  $Mg^{2+}$  + FBS.** 5 nM DNO was incubated at 37°C for 12 hrs in 6mM  $Mg^{2+}$  RPMI with a range of added DNase I, or FBS, and the products were analyzed by AGE. In comparison to the control DNO lane, DNase I concentrations greater than 256 U/L resulted in complete loss of the product band, and FBS concentrations of 10 and 20% resulted in smearing, indicative of partially digested product. M = molecular weight marker, C = DNO in RPMI + 6 mM  $Mg^{2+}$ .

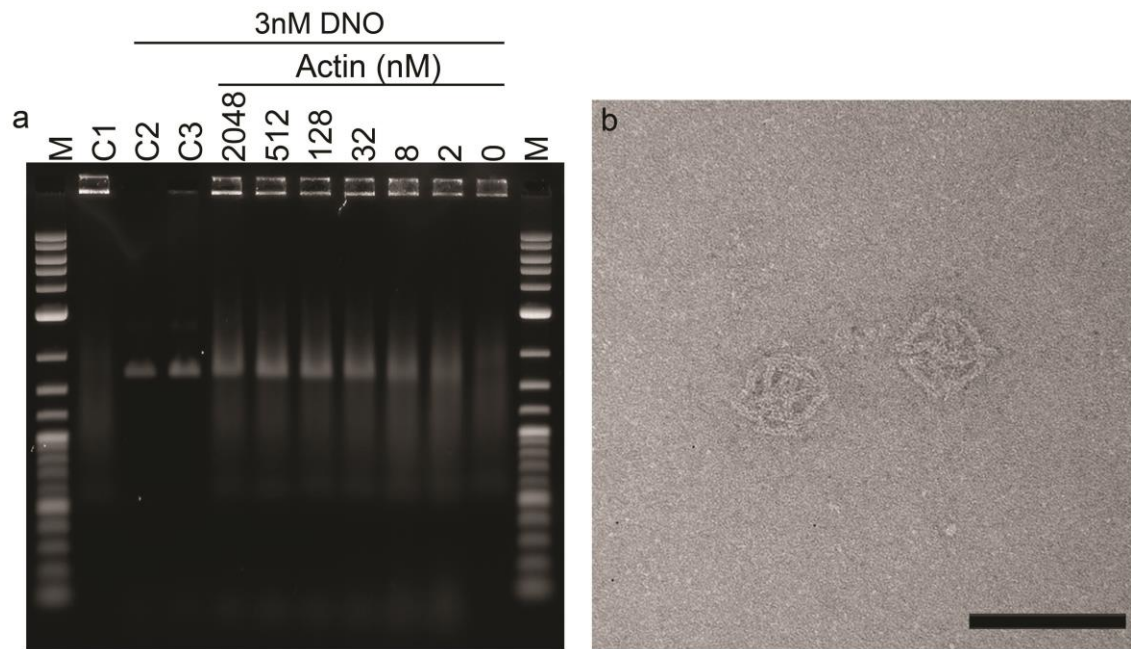

**Supporting Information Fig. 9. Concentration-dependent actin inhibition of DNO nuclease digestion.** (a) RPMI + 6 mM Mg<sup>2+</sup> + 10% FBS was prepared, and 0 – 2048 nM actin was added with 15 nM DNO. Following incubation for 24 hrs at 37°C, the products were analyzed by AGE to assess inhibition of DNO nuclease digestion. M = molecular weight marker, C1 = RPMI + 6mM Mg<sup>2+</sup> + 10% FBS + 1000 nM actin, C2 = RPMI + 6 mM Mg<sup>2+</sup> + DNO, C3 = RPMI + 6 mM Mg<sup>2+</sup> + DNO + 1000 nM actin. (b) TEM imaging showing intact DNO incubated in 250 nM actin. Scale bars = 100 nm.

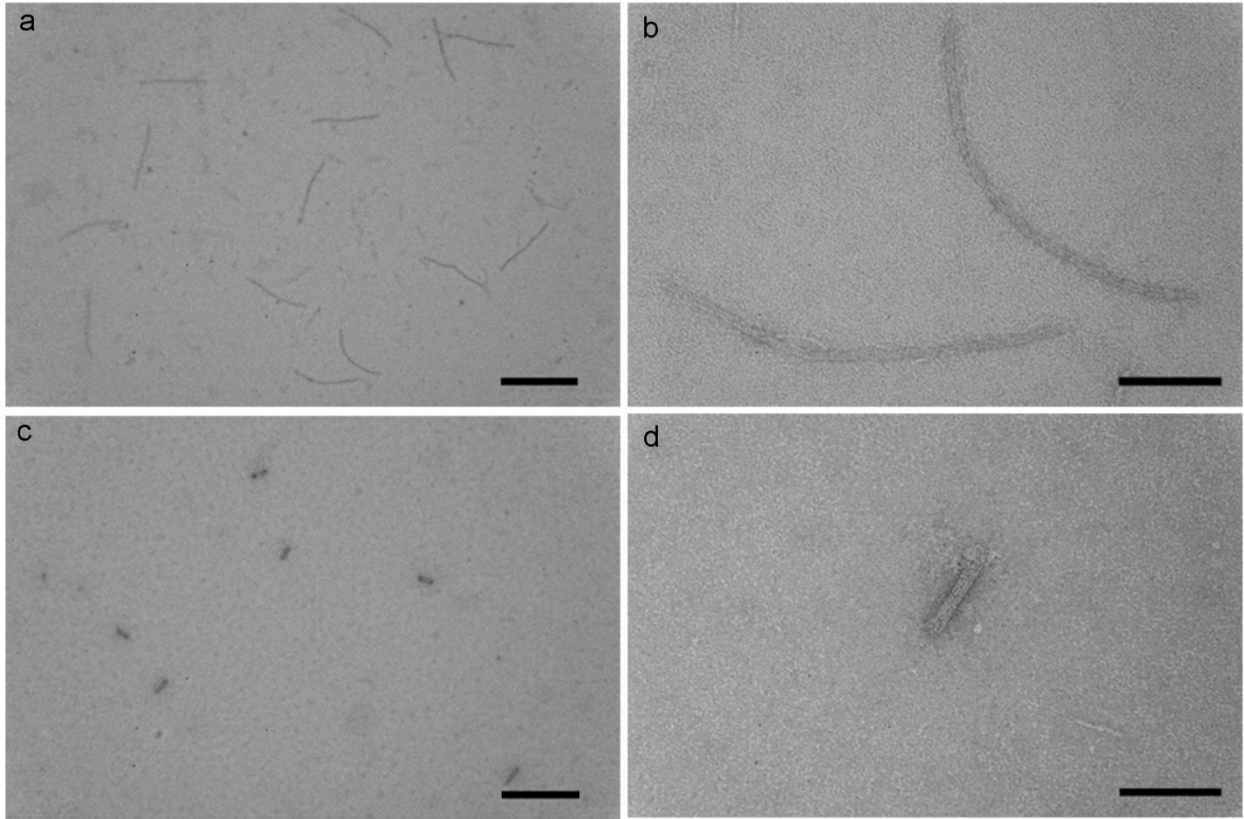

**Supporting Information Fig. 10.** TEM imaging of the (a,b) NT and (c,d) NR after incubation in RPMI + 6 mM  $Mg^{2+}$  + 10% FBS + 200 mM actin at 37°C for 24 hrs. Scale bars = 500 nm (a,c) and 100 nm (b,d).

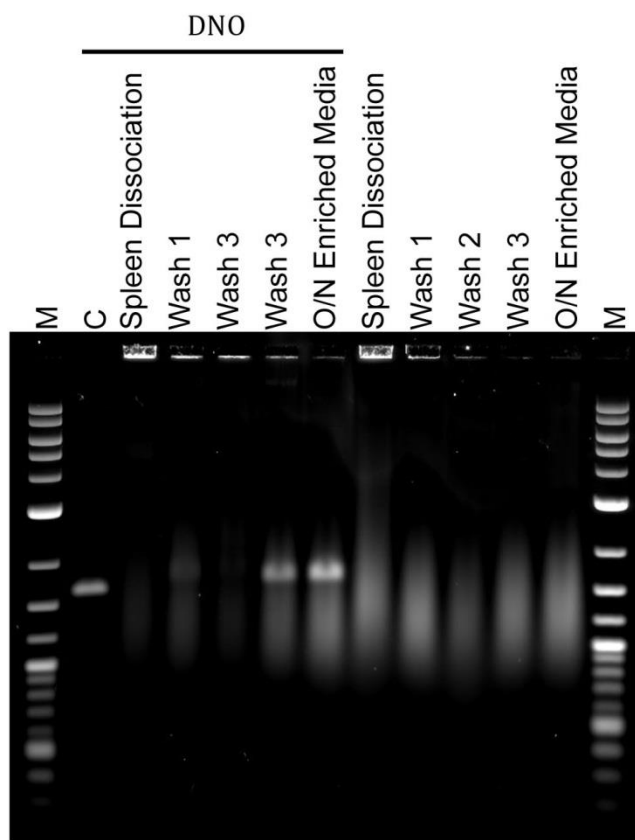

**Supporting Information Fig. 11. Analysis of nanostructure digestion by nucleases present in splenic tissue.** Immune cells were obtained from spleen dissociation. The cells were washed three times with large volumes of nuclease-free media to remove inherent nuclease activity by dilution. The cells were then incubated with media (RPMI + 10% heat-inactivated FBS) for 24 hrs. Aliquots of the dissociation supernatant, washes, and cell-enriched media were then incubated with 5 nM DNO for 24 hrs at 37°C, and the products were analyzed by AGE. The nanostructure remains intact after 3 washes, and nuclease activity is not regained by splenocyte enrichment. A slight shift in DNO migration is observed compared to the control, which may be due to an interaction with factors present in the media. The right side of the gel shows DNO-negative samples and smearing from heat-inactivation of the FBS. M = molecular weight marker, C = control DNO in TE + 10 mM Mg<sup>2+</sup>.

**Supporting Table 1. Staple list for the DNO.**

| <b>Number</b> | <b>Sequence</b>                                   | <b>Length</b> |
|---------------|---------------------------------------------------|---------------|
| 1             | CCAGCGAGTTACTTAGCCGACTAAAGACACTCATCAGCGCTAA       | 43            |
| 2             | TTCTTAACAGGGAGTTAAATAGAAAGGAGCTTTCGATCATCAT       | 43            |
| 3             | GAAAACACCTTGCTTCTGTTCATCGGGAGTGAAACATTTTCCCA      | 43            |
| 4             | CCTGCCTCGGCAAAATCCCTTATAAATCAAACAGTTGGTAATA       | 43            |
| 5             | ACCGAACATATTGAATAACTTTTCTCAGAGCCGGAACCCGTAACAAA   | 47            |
| 6             | CTCAGTGCCAGCAGAATGGTTTTAGCTACACTTAAATCCGCCACCCT   | 47            |
| 7             | GTAGATATTTTGTTTTCACTTTTACAGACAACCAGTACATCAGATAT   | 47            |
| 8             | GGAAACGCATCGGGTAAAATTTTAACCGATGCCGACAAATTATCATT   | 47            |
| 9             | GGCTTTTTTTCATTGAATCCCTAGGAATACACCAAAATTTGACGA     | 43            |
| 10            | AAACTTTAATAAGAATAAATAGTGAATTACAAAGAGATTAGAG       | 43            |
| 11            | TTTAGTAAATCACCGAAAGTTTTGTATTGGAATCGGCCTCGAGCCAG   | 47            |
| 12            | TATCAGATTTTTAAGAAAATTAACGTCAGTAATTGTTTGACCC       | 43            |
| 13            | AATTCATTAAAGGTGAATTTTAAGACTCTCACAATACAAAGGC       | 43            |
| 14            | CATATAAACATACTTTTTATTTTGTAAATAATTACATTGGGTGGCATC  | 47            |
| 15            | ACCCATGATCTAAAGTTTTTCGGAATAGGGCAAGCCTTTAGCGA      | 43            |
| 16            | AGTACCTTTTTTAAATATGCAGCAAAGCGAGGTCAGACGCGAGA      | 43            |
| 17            | TTAGAGCTCATAATCACCATTTTTGTACCAAATAAAGCATATTACCG   | 47            |
| 18            | TCCAGACATCCCATCCTAAAACAGTAGGGGTAAAGTCCAGTCG       | 43            |
| 19            | GGCTGTAATTCGAGCATAATTTTCCTTTGACCAAGCTTGAATTATTC   | 47            |
| 20            | AAATATGAAACGGAAAATTTTTAATAGCATTAAAGCCCAACCTAAA    | 47            |
| 21            | GCCCTGTATGCGACGCCAATTTTATCACCCGGGCGAAATAAAGAACG   | 47            |
| 22            | GGAAACCTCACCCAGTGAGATTATCCGCTCCCGCTTTAATTCTG      | 43            |
| 23            | ACCTCCCACGCTAACGAGCTCATCGAGAGAGGCGTCAATAGGA       | 43            |
| 24            | TATCAGGTTGATAATCAGAAAGATTCAAGAGATCTCAATAGAA       | 43            |
| 25            | CGTTTGCCCCCTCAGAGCCAACGTCACCATAGCCCCAAACACCA      | 43            |
| 26            | AATAAAGGCGGACCGCCACTTTTTTGTGTCTACAACGGCGGGAGAAT   | 47            |
| 27            | AATCCTCACCGCGCGGGCCTTTTGTGAATGGTCATTTTAACTATAT    | 47            |
| 28            | TCTGTACCTTATAGGAATCTTTTTAGATAAAGCTAATGGAGTGAGCT   | 47            |
| 29            | CAGAGCCCAACTACAAGAATTTTAAGAGAAAACATGAATTCCAGTAA   | 47            |
| 30            | TTTTAGTCCATCACTATCGTTTTAGGGATTTTCAGAGCGACACTATCA  | 47            |
| 31            | GTCACGAGACCGTATACGCCATTCAGGCGCCAGGGAACATCAA       | 43            |
| 32            | GAACTACAAAATCAGTAGCTTTTTAAGGTAAAAAAGGGCGCTGATAAA  | 47            |
| 33            | ACCGAGAGGTTTTGAATACTTTTCTGAATATCAATATATCCAAAAGG   | 47            |
| 34            | GCACGTAGAATCCTGAGAAAGAAAGCGATGGTTGCTAGCGAGA       | 43            |
| 35            | GATTTAAGTTGCGTTGTTCTTTTTCCAATAGGGTAATACCCGCCGCG   | 47            |
| 36            | GAACGAGTACCAGTCAGGACGCATAGGCTGACGAGCTTATTAG       | 43            |
| 37            | CCGTGGGGGGACGACGACATTGTTAAATAACCCGTATGAAAAA       | 43            |
| 38            | AGTTTTAAGGTGCCGTAAACTTGATATTAGTGTACTAATGCCC       | 43            |
| 39            | AAAGAGAACAACCCAAAAGTTTTTATGCGTTTAATTTGTCAGACTG    | 47            |
| 40            | ATTCCTGATATCAAATTAACAAACAATCGGAATTAGGTGAAT        | 43            |
| 41            | AGCTTTTTTGAAGCAGAAGTTTTACATAAATCATTGAAAAGGGGGA    | 47            |
| 42            | GCGAAACAATAGGAACGTTTTTGTCAAATCTATCAAACACTAGCCAGCT | 47            |
| 43            | GAATGATTGACGTGTAGCGTTTTTACCGACTCATCTTCGAGCTTCAA   | 47            |
| 44            | TTAGAGATTGTACATCAAATTTTACTAGCAAAACAAGAAAAGAAACG   | 47            |
| 45            | AGACAATTGATTCTATATTTTTTATCGTAAATGGGATATATTAACAC   | 47            |
| 46            | TTGACGCAGATAGAACCCTTAGTAATAAGGAAATAATCATACA       | 43            |
| 47            | TCTAAAGAAGGTTATCTAATAAAACATCGCAGCAACGGATTCT       | 43            |

|    |                                               |    |
|----|-----------------------------------------------|----|
| 48 | GGCAAGGACTTTTGC GGGATTAGATACACCAATAACCTACATT  | 43 |
| 49 | ACCGCCACATCTTTGAATAAGGCTTGCCCTGGCTGAGGTGTA    | 42 |
| 50 | TATTCATATGGTTTGGTAGCTATTTTTGAAAGGGTGAGTAAT    | 42 |
| 51 | CTGTAATCAAAGAAAGGAAAAACGCTCATCATCACTCAATAC    | 42 |
| 52 | GTTTGAGAACAAACCCACGCTGAGAGCCAGCCATTAGCGAAC    | 42 |
| 53 | TAAATATGCAAAAGACAGGGCGCGTACTAAAGGAGCCGAGAA    | 42 |
| 54 | TGAATAAAAATTAATTAAGTTGGGTAAGTGC GCAACAAAGC    | 42 |
| 55 | GCTCCATTTATACCGAACAAAGTCAGAGGAAAATGAGAAACG    | 42 |
| 56 | TTTCTTTTGTTCGTGAAAGTACCGACAAAAGCTTAATATAAAG   | 42 |
| 57 | ACCTACCATTATCATCGGTTTATCAGCTTACA ACTATCAGCG   | 42 |
| 58 | GGGGTCGACGGGGTTAACAGTGCCCGTATAAAAGAATTGCC     | 42 |
| 59 | CGTAACGTACCGTAGTATTCTAAGAACGCACAAGCAAACCAA    | 42 |
| 60 | CAACATGTTAATTGAAATCCAATCGCAAGTATCAAAGCTGAG    | 42 |
| 61 | CAGAGCTTTAGTATAAGTGCCGTCGATTGCCACCTGAAT       | 39 |
| 62 | TGTGCTGATCGGTTTCTGGTGCCGAAATTTTATGTGAG        | 39 |
| 63 | ATTAATCCAATATCTTTAGGAGCACTTGTTAAATTTTTTA      | 41 |
| 64 | GAAGGGCGCAAGGCGTTACATTTAACAATTTCAATATCCCTTAG  | 44 |
| 65 | CAAGAGTCATTCAGTTCATAATCAAAATCACCGCCACCCACCAC  | 44 |
| 66 | GCCATTCTAAAATCGTCGCTATTAATTAACCAGGCTGTTGG     | 41 |
| 67 | TACCTTTGCATGGCTAGTACCCGTATATATACAGAACGGAT     | 41 |
| 68 | CTCATTATAGTAAACGGCATTTTCGGTCAATGAAACTTAGCA    | 42 |
| 69 | ATTTTTTGGGAACGAGGGCGCAGACGGTCAAATAAAAATAGC    | 41 |
| 70 | TAAATCCAACAAAGAGATACCGATAGTTGCATATTCGCTCAGCA  | 44 |
| 71 | TTCTTTGCAGAAGCCTTTATTTCAACGGTTGTAGTGCCTGA     | 41 |
| 72 | AGGCCGGGGCGTTGGGAAGAAAAATCTATTACCACATCGAT     | 41 |
| 73 | CAGACCAAACCACCTCAGAGCCGCCAGATGAACCCTTCAT      | 41 |
| 74 | GTTTGACATTCTGACCTGAAAGCGTAAACGAGTAAATGGTC     | 41 |
| 75 | GTAGAAGATTGCAACTTAGCAAAATTAAGCAAAACATTA AAAAT | 44 |
| 76 | ACCAATAAACATTAATTGCTGAACCTCAAAAACAGTTTAATAGA  | 44 |
| 77 | CCAACAGTCAATCGTAGTAGCATTAAACATTTTCGCAGATTTA   | 42 |
| 78 | TGATAGCTTGTATCGGCCTCAGGAAGATTAATGCAAAATAC     | 41 |
| 79 | CGAACGACAACAGTGGGCGGATTGACCGTACCGTGCATCCAGCC  | 44 |
| 80 | AATTCTTGTTTAGCCCAATTCTGCGAGAATACATTCTGG       | 39 |
| 81 | CCAGCCAACTCAAACGCAAATTAACCCAAGGATATGACC       | 39 |
| 82 | ATTGAGGCATCACCATGTGAGCGAGTAACCAGCTCAATTCGC    | 42 |
| 83 | TTGCGGTTTGCCATAATACATTTGAGTCACCGTCGCTG        | 39 |
| 84 | CGCCTGACCACCATGGCTATTAGTCTTCGCACTCTGCCA       | 39 |
| 85 | TTCATCGGAACGCAACGTTAATATTTAACAACGAAAGGA       | 39 |
| 86 | AATAACCACTAATAGTCTGAAATGGATTATAAGGGACGTGGCAC  | 44 |
| 87 | AGCAGCAGTTTTTCATTTGGGCTTGAGATGGATTTTAAATAAAAC | 44 |
| 88 | AGTATAGACGTCTTTCCAGAGCCTAATGAGGGTTCCGTACT     | 41 |
| 89 | GTACCGCCCGTCGTCTTTCCAGACGTTGGTATTAAGCCGTT     | 41 |
| 90 | TAGCGCCCGTAATCACCGTAGCACCACGTTAGA ACTGG       | 39 |
| 91 | TTTATTTCTTATCCGACACTGAGTTTCGTCGCCCTCATGAATTT  | 44 |
| 92 | CTTACCAGACTTGCTCATTTTCAGGGATATGTATCAGATATA    | 42 |
| 93 | AGAAGGTCATCGTCAATCCAAGAACGAGTAAATAGTTAG       | 39 |
| 94 | TTAATGCAGTCAATATTTTAAATGCAAGCCATCGGAAAT       | 39 |
| 95 | ACCCCGGTCATTGCAATAAGTTTATTTTGCTTATTAAAAGAA    | 42 |
| 96 | AACTCAAGCCGGATAATCATGGTCATCCAATCACAAGAA       | 39 |
| 97 | TCGCCTGATTACCTGAAACGACGGCCAGTGTAGCGAGCCCGGGT  | 44 |

|     |                                                |    |
|-----|------------------------------------------------|----|
| 98  | ACATACGCATTAATTATAAAACAACATGTTTCGTCCTGAAATAATC | 44 |
| 99  | CCGGAGACCGGAGAGACCAGCGCCAAAGACATATTGATTGGGAA   | 44 |
| 100 | GTGAAATTCCTTTACGAGCATGTAGAAAAGCTGTTCCACACA     | 41 |
| 101 | CCAACGCTGCGGGCAACAGCTGATTGCTACCAGTTGAGAAT      | 41 |
| 102 | GTGTAGGGAATCACCGTCACCGACTTGATGCCTGAGAAAGG      | 41 |
| 103 | CGCCATAGAGAATATCCAGCTGCATTAATGGCGCCAGCCGCTG    | 44 |
| 104 | AAATAATGACGACAGCGTTGCGCTCACTGCACAATTCCTGT      | 42 |
| 105 | TAATAATTTAACATTATACAAATTCTCCTTCAGGTGGTT        | 39 |
| 106 | CTGGCATTAAAAGCCCCAAAAACAGGAATACCCACGCAGTA      | 41 |
| 107 | TGTTAGCCACCACGGCTGAGAGTCTGGAGCTGTCAATTATAAGC   | 44 |
| 108 | AGCGAAAGGAAGCAAATCAGGTCTTTAGAAATAAATAA         | 39 |
| 109 | CGCTAGCCGTTGTAAGCAAAGAAGATGAAAACAATTAACAG      | 42 |
| 110 | GATTAAGCCAGACCGATATTTTAGTTAATTCGTGTGAAAGCCTG   | 44 |
| 111 | CAAAGAAAACGTACAATAATAACGGAAGATTGCATATGT        | 39 |
| 112 | ATAGTCAAACACCGGAATCATAATTACTACCCTGTCAAAAA      | 41 |
| 113 | AAGAGTCGAAACTAAAGTACGGTGTCTTTAAGACATCATAG      | 41 |
| 114 | TAAGTACAGAGAATTTATCCCAATCCAATCAGCGACCT         | 39 |
| 115 | GTCTGAGGCTGATGCCTCCTTTTGATAAGAATAATGCTTCATTC   | 44 |
| 116 | GGCGTTATTCAAATGAAGCAAACCTCCAACGATTGCAACTATT    | 42 |
| 117 | GTAAATAGACTACGCGATAGCTTAGAGGAAGTTGTAGCT        | 39 |
| 118 | GAAGCCCGAGATAAAGAATACACTAAAACCTTTTTCAACAGAG    | 42 |
| 119 | AGCCTTTAACACCCTAAGCGCGAAACAAAGGAAATCCTAAGGGA   | 44 |
| 120 | TAACCCCATAACGATTATTACAGGTAAGGCCAGGAACGG        | 39 |
| 121 | CAGGAGGCACCACCCGGGAGGTTTTGAAGCATTTTATGTTACAA   | 44 |
| 122 | GCAGATATCGTTACCTTTCCTCGTTAGAATTAGACACCGAGTA    | 44 |
| 123 | TTAGACTAAGGCCGCTTTTTCGCGGATCGGATTTACTCGTAT     | 41 |
| 124 | GTTGAGAGAGTGTTTTTATAATCAGTGGAAAGATAACTAAT      | 41 |
| 125 | AGGAAGGTTCCCTCAAATGCTTTAAACAAACGTGGGGGCGCT     | 41 |
| 126 | GAGTGAGTTTTTGCACGTAACAGAAAACAGTTAAGGAAT        | 41 |
| 127 | AGGGCGCGCGCCGCTAAGTTTTGCCAGAGGCTGCGGAAAAACGA   | 44 |
| 128 | TACGCCATAACGTGCAGACGACGATAAAAACACATTCTCATCA    | 42 |
| 129 | CTTAATTGGCAAGGGGAAAGCCGGCGGTTTCAGATCGTCA       | 39 |
| 130 | TGCGAATTAATTGTAGATGATGGCAATTCAATGGAAGAAATTGC   | 44 |
| 131 | AGGCTTGACAGCTTAACCACCAGAAGGAGTCGACAAGAAGTA     | 42 |
| 132 | GCGTCATAAAGCCATTGACAGGAGGTGGGCGGGATTATT        | 39 |
| 133 | AGCCTTAATAATTCTAAACAACCTTCATAAAGGGTTAGA        | 39 |
| 134 | TCCTCATTACATGGCAACCTATTATTCTGAGGATTAGGGTTTTTG  | 44 |
| 135 | GTTTCCAGAGGCCAAACCCACAAGAATTGAGATAGCTAACCAGAA  | 44 |
| 136 | ACGATTGCGAAAATCCTGTTTGATGGTTGAGGCAAAATAAA      | 41 |
| 137 | CAGCAGGGCGCACTAAATCGGAACCCTCGCTGGTTAGCCCG      | 41 |
| 138 | ACGAAATTAACGGAACGAGGGTAGCAAAGTTTCTTACC         | 39 |
| 139 | AGATAGGCCCTTGAGCAGTGCAACGTCAAAAAATCAAAGCCCC    | 44 |
| 140 | CCGAAATATTTTCGGTTTTGATGATACAGGCACAAACGGTCAG    | 42 |
| 141 | TGGACTGTTGAGTAGCAAGCGGTCCAAAAGGGGTTTTTT        | 39 |
| 142 | ATTTCAATTGCTTAACGTCAGATGAAAGGATCGCAAGTC        | 39 |
| 143 | GCTTTGAGTGTAAGCAGATAGCCGAACAACGGCTTGAGGAA      | 41 |
| 144 | GCTGCTAATCTTGTTGAAAGAGGACACCAGAACCTCAGA        | 39 |



**Supporting Table 2. Staple list for the 6-helix bundle NT.**

| <b>Number</b> | <b>Sequence</b>                             | <b>Length</b> |
|---------------|---------------------------------------------|---------------|
| 1             | AGTAATAAAAGGGACTGTTTCCTGTGTGCCTTTGATAGCGAG  | 42            |
| 2             | AAATGGATTATTTAAACATACGAGCCGGACGGCCAGTGCCAA  | 42            |
| 3             | AACGCTCATGGAAATAATGAGTGAGCTATGGGTAAACGCCAGG | 42            |
| 4             | AATATCCAGAACAACCCGCTTTCCAGTCCGCCAGCTGGCGAA  | 42            |
| 5             | ACTTGCCTGAGTAGTGAATCGGCCAACGAACTGTTGGGAAGG  | 42            |
| 6             | ATTAACCGTTGTAGCGCCAGGGTGGTTTGCCGAAACCAGGC   | 42            |
| 7             | ATCAGTGAGGCCACCTGATTGCCCTTCAGGAAGATCGCACTC  | 42            |
| 8             | AGACAGGAACGGTAGCGGTCCACGCTGGTGCATCTGCCAGTT  | 42            |
| 9             | ATCAGAGCGGGAGCGATGGTGGTTCCGAATGGGATAGGTCAC  | 42            |
| 10            | GGTTGCTTTGACGAGAATAGCCCGAGATCCCGTCGGATTCTC  | 42            |
| 11            | ACACCCGCCGCGCTAAGAGTCCACTATTTGTAGCCAGCTTTC  | 42            |
| 12            | AGGGCGCTGGCAAGCGAAAAACCGTCTACCAATAGGAACGCC  | 42            |
| 13            | GTGGCGAGAAAGGATCACCCAAATCAAGAAAATTCGCATTAA  | 42            |
| 14            | GGGAGCCCCCGATTCTAAATCGGAACCCTGTATAAGCAAATA  | 42            |
| 15            | AAGAACTGGCTCATCGGAACAACATTATTACCCCGGTTGATA  | 42            |
| 16            | TAATTTCAACTTTATTTAGGAATACCACATCGATGAACGGTA  | 42            |
| 17            | GAGAAACACCAGAAAAAGGAATTACGAGGGCTATCAGGTCAT  | 42            |
| 18            | CGTAACAAAGCTGCCTCGTTTACCAGACATTAATGCCGGAGA  | 42            |
| 19            | GAGTAATCTTGACATTTTGCAAAAGAAGCAAATCACCATCAA  | 42            |
| 20            | CGGTGTACAGACCATTTAGACTGGATAGTGTAGGTAAAGATT  | 42            |
| 21            | TAAGGGAACCGAACATTCATTGAATCCCTTTAGAACCCTCAT  | 42            |
| 22            | CTCCATGTTACTTACGAGAATGACCATATTTTGCGGGAGAAG  | 42            |
| 23            | TTGTATCATCGCCTATTATAGTCAGAAGAGCTAAATCGGTTG  | 42            |
| 24            | CCCAGCGATTATACAGGAAGCCCGAAAGCAAAGAATTAGCAA  | 42            |
| 25            | CGAAAGAGGCCAAAATTCAAAGCGAACCAAATAGTAGTAGCAT | 42            |
| 26            | GGGTAAAATACGTAATTAGAGAGTACCTTTCATTTGGGGCGC  | 42            |
| 27            | TTGAGGACTAAAGATTTTGCGGATGGCTAGATACATTTGCA   | 42            |
| 28            | AAAGACAGCATCGGTAGCTCAACATGTTTGATTCCCAATTCT  | 42            |
| 29            | TTACCAGCGCCAAATTAGTTTGACCATTTAGAGCTTAATTGC  | 42            |
| 30            | AATAAGTTTATTTTTGTTTAGCTATATTTAATTGCTCCTTT   | 42            |
| 31            | ATAAAGGTGGCAACGCATCAATTCTACTGACCGGAAGCAAAC  | 42            |
| 32            | TCCTTATTACGCAGTCATACAGGCAAGGACTTCAAATATCGC  | 42            |
| 33            | CAATAATAACGGAAGCCTCAGAGCATAACAAAGCGGATTGCA  | 42            |
| 34            | CAGATAGCCGAACATGACCCTGTAATACAATCAAAAATCAGG  | 42            |
| 35            | AGCAATAGCTATCTCAAGGATAAAAATTCCTCAAATGCTTTA  | 42            |
| 36            | AATTGAGTTAAGCCATGCCTGAGTAATGCGTCCAATACTGCG  | 42            |
| 37            | AGAGGGTAATTGAGAGGCCGGAGACAGTTTTTTGCCAGAGGGG | 42            |
| 38            | CGCATTAGACGGGAGTTCTAGCTGATAAGACGATAAAAACCA  | 42            |
| 39            | AATAGCAGCCTTTAGAGAGATCTACAAAGCATAGTAAGAGCA  | 42            |
| 40            | ATCCAAATAAGAAAGAGCAAACAAGAGAATTCAACTAATGCA  | 42            |

41 AATTTGCCAGTTACATGTCAATCATATGTACAGGTAGAAAGA 42  
42 TCCTGAATCTTACCAAAAACAGGAAGATTA AAAATCTACGTTA 42  
43 AAATCAAGATTAGTGTTAATATTTTGT TTTTTTTGGGGTCGA 42  
44 GTTTTAGCGAACCTAGCTCATT TTTTAATCAGGGCGATGGCC 42  
45 TCAGATATAGAAGGGCGTCTGGCCTTCCA AAGAACGTGGACT 42  
46 TTTTCATCGTAGGATGAGCGAGTAACA AAGGGTTGAGTGTTG 42  
47 AACCAAGTACCGCAGCGGATTGACCGTAA ATCGGCAAAATCC 42  
48 ATAATCGGCTGTCTGCGCATCGTAA CCGTTTGCCCCAGCAGG 42  
49 ATAATATCCCATCCAGTATCGGCCTCAC CGCCTGGCCCTGA 42  
50 CGCGCCTGTTTATCGCACCGCTTCTGGT TTTCTTTTCACCAGT 42  
51 TCCAGACGACGACACATTCAGGCTGCGC CGCGGGGAGAGGCG 42  
52 ATAAGAGAATATAACCTCTTCGCTATTAG GGAAACCTGTCGT 42  
53 ACGCCAACATGTAACAAGGCGATTAAGT ACTCACATTAATTG 42  
54 CGCTCAACAGTAGGGACGTTGTAAAACGA AGCATAAAGTGTA 42  
55 GTATCATATGCGTTAGGTGCGACTCTAGA AAAATTGTTATCCGC 42  
56 GAATAAACACCGGAGACCGTATACGCATG AGCTCGAATTCGT 42  
57 AAAC TTTTTCAAATCCTGAAAGCGTAA GGAGATAGAACCCTT 42  
58 AAATGCTGATGCAATGGCTATTAGTCTT CCAGTCACACGACC 42  
59 CTTTTTAACCTCCGTGCGCATTA AAAATCGCTCAATCGTCTG 42  
60 GTC AATAGTGAATTACAGAGGTGAGGCG ATTGCAACAGGAAA 42  
61 CTTGAAAACATAGCCCACGCTGAGAGCCT CGGCCTTGCTGGT 42  
62 CTTCTGTAAATCGTCCTTGCTGAACCTCT TAGTAATAACATC 42  
63 GGAAACAGTACATATCAGTTGGCAAATCT GTCCATCACGCAA 42  
64 TTAATTACATTTAATCTAAAATATCTTTG AAGTGTTTTTATA 42  
65 TGAGCAAAAAGAAGACCGTCAATAGATAA ATTAAGGGATTTT 42  
66 GTTACAAAATCGCGTTTACAAACAATTCC TTTTCCTCGTTAGA 42  
67 GGAGAAACAATAACACGTTATTAATTTT TAGGGCGCGTACTAT 42  
68 TTAACGTCAGATGAGGAACAAAGAAACCT GCGCGTAACCACC 42  
69 GCACGTAAAACAGATCCTGATTATCAGAA AGGAGCGGGCGCT 42  
70 TGAATAATGGAAGGTTGTTTGGATTATAG AAAGCCGGCGAAC 42  
71 AGTAACAGTGCCCGGAAAGTATTAAGAGC GTTGGGAAGAAAA 42  
72 AGGAGTGTACTGGTATTAGCGGGGTTTTC CTTATGCGATTTT 42  
73 TTTACCGTTCCAGTGAGAGGGTTGATATG GCTTGAGATGGTT 42  
74 TAAATCCTCATTAAAGTACTCAGGAGGTTA GGCTTGCCCTGAC 42  
75 TTGAGGCAGGTCAGCTCAGAACCGCCACAT TACCCAAATCAA 42  
76 ACCAGAACCACCACGATAGCAAGCCCAACT GACCTTCATCAA 42  
77 CTCAGAACCGCCACTTCGTCACCAGTACAG AGGACAGATGAA 42  
78 ACCAGAGCCACCACACAGCCCTCATAGTC AGACGGTCAATCA 42  
79 CTTATTAGCGTTTGT TTTCCAGACGTTAG AAATCCGCGACCTG 42  
80 AGACTGTAGCGCGTTAAACA ACTTTCAAAGTACAACGGAGAT 42  
81 ACCGTAATCAGTAGAACA ACTAAAGGAAACTCATCTTTGACC 42  
82 AGCAAGGCCGGAAAAATCTCCA AAAAAAGCACCAACCTAAAA 42  
83 GGAATTAGAGCCAGCGGTTTATCAGCTTAG TTTCCATTA AAC 42

84 CATTAAAGGTGAATTGATACCGATAGTTCGGCTACAGAGGCT 42  
85 TGAATATAATGCTGAACGAGGGTAGCAAGCGCCGACAATGAC 42  
86 TGATAAGAGGTCATCTTTTTCATGAGGAGCTTTCGAGGTGAA 42  
87 TCCAACAGGTCAGGATGCCACTACGAAGAGGCTCCAAAAGGA 42  
88 GTTTTAATTCGAGCGAATACTAAAACCTTGCGAATAATAAT 42  
89 TCAAAAAGATTAAGCAAGCGCGAAACAACAGTTTCAGCGGAG 42  
90 TCTTTACCCTGACTGATAAATTGTGTCGTAAATGAATTTTCT 42  
91 AACAGTTCAGAAAAGCCGGAACGAGGCGTAGCGTAACGATCT 42  
92 GAATCGTCATAAATTGACCAACTTTGAAAACTACAACGCCT 42  
93 GTAATAGTAAAATGGGCGCATAGGCTGGTAGGAACCCATGTA 42  
94 AAATAGCGAGAGGCAGAACCGGATATCCCTCAGAGCCACCA 42  
95 ACACTATCATAACCTCATTAGTGAATATAGTACCGCCACCC 42  
96 GATACATAACGCCACGAGTAGTAAATTGAAGTATAGCCCGGA 42  
97 TTCATCAGTTGAGAATCATTGTGAATTAGCTCAGTACCAGGC 42  
98 ATAAAACGAACTAATATACCAGTCAGGAGCTGAGACTCCTCA 42  
99 GGTGCCGTAAAGCATAGAGCTTGACGGGCTTTTCGGAACCTA 42  
100 CACTACGTGAACCAAGGGAAGAAAGCGATGATGGCAATTCAT 42  
101 CCAACGTCAAAGGGTGTAGCGGTCACGCACCAGAAGGAGCGG 42  
102 TTCCAGTTTGGAATAATGCGCCGCTACAAAAGTTTGAGTAA 42  
103 CTTATAAATCAAAGCACGTATAACGTGGACAACCTCGTATTA 42  
104 CGAAAATCCTGTTTTAAACAGGAGGCCGTACATTTGAGGATT 42  
105 GAGAGTTGCAGCAACGCCAGAATCCTGAAGGAGCACTAACAA 42  
106 GAGACGGGCAACAGCGAGTAAAAGAGTCAACAGTTGAAAGGA 42  
107 GTTTGCGTATTGGGCAATACTTCTTTGAAAATATCAAACCCT 42  
108 GCCAGCTGCATTAAGAAGAACTCAAATAAGCAGCAAATGAAA 42  
109 CGTTGCGCTCACTGTATTACCGCCAGCCGTCAGTATTAACAC 42  
110 AAGCCTGGGGTGCCTACCTACATTTTGAACCGAACGAACCAC 42  
111 TCACAATTCCACACCATTGGCAGATTCATAATGCGCGAACTG 42  
112 AATCATGGTCATAGCATTCTGGCCAACAAATACGTGGCACAG 42  
113 GCAAGTCCGCTAGCATCATAATTACTAGCAAAGAACGCGAGA 42  
114 GCTTGCATGCCTGCATACAAATTCTTACATATAACTATATGT 42  
115 GTTTTCCCAGTCACGCTTAATTGAGAATGTCTGAGAGACTAC 42  
116 AGGGGGATGTGCTGTTTAGGCAGAGGCAAGACGCTGAGAAGA 42  
117 GCGATCGGTGCGGGAGTACCGACAAAAGTTTCCCTTAGAATC 42  
118 AAAGCGCCATTTCGCATAAACAACATGTTAGTGAATAACCTTG 42  
119 CAGCCAGCTTTCGGAACAATAGATAAGTTTACCTTTTTTAAT 42  
120 TGAGGGGACGACGATAATTTACGAGCATTCAAGAAAACAAAA 42  
121 GTTGGTGTAGATGGTTCCTTATCATTCCCTCATTTCATTACC 42  
122 CGTGGGAACAAACGCTCATCGAGAACAAGCTTTGAATACCAA 42  
123 ATCAACATTAATGATCATTACCGCGCCTACCTTTTACATCG 42  
124 ATCAAAAATAATTCCTTATCCGGTATTCGTAGATTTTCAGGT 42  
125 ATTTTTGTAAATCCCCGACTTGCGGGATATCAAATTTATTT 42  
126 TTAAATTGTAAACTGCTATTTTGACCCGCCCTGCCTATC 42

127 ATCAGAAAAGCCCCAACGCTAACGAGCGGGGTCAGTGCCTTG 42  
128 ATCGTAAAACTAGCAAATAAACAGCCAGCTTTTGATGATAC 42  
129 TGCCTGAGAGTCTGCGATTTTTTGTAGCGCAGTCTCTGAA 42  
130 GGGTAGCTATTTTCAGAGAGAATAACATATTCACAAACAAA 42  
131 TATGATATTCAACCGAATTAAGTGAACAGCATTGACAGGAGG 42  
132 CAAAAGGGTGAGAACGCTAATATCAGAGCCCTCAGAGCCGCC 42  
133 ATATTTTAAATGCACAATAATAAGAGCATCAGAGCCGCCACC 42  
134 CCTTTATTTCAACGTACCGAAGCCCTTTTCAAATCACCGGA 42  
135 TACCAAAAACATTAAGTTACCAGAAGGTCGGTCATAGCCCC 42  
136 AATTAAGCAATAAATACCCAAAAGAACTTTGCCTTTAGCGTC 42  
137 TAACATCCAATAAATATGTTAGCAAACGCCATCGATAGCAGC 42  
138 GAGCTGAAAAGGTGATATAAAAGAAACGGCACCATTACCATT 42  
139 AATGGTCAATAACCGTCACAATCAATAGACTTGAGCCATTTG 42  
140 GCGAACGAGTAGATGACAAAAGGGCGACTGACGGAATTATT 42  
141 AACCAACCATCGCCCGGAAGGTAAATATATTCAACCGATTGA 42  
142 TTTCTTAAACAGCTTATCACCGTCACCGAAAATTCATATGGT 42  
143 GCCTTTAATTGTATCAAATCACCGTACAAAGACACCACGG 42  
144 TTTTTCACGTTGAACGTCACCAATGAAATAGAAAATACATAC 42  
145 TGAGAATAGAAAGGCGACAGAATCAAGTGGCATGATTAAGAC 42  
146 GTATGGGATTTTGCTTTCATCGGCATTTAAACCGAGGAAACG 42  
147 AAAGTTTTGTCGTCCCATCTTTTCATAATTAAGAAAAGTAAG 42  
148 GTAGCATTCCACAGCGGAACCGCCTCCCAGAAACAATGAAAT 42  
149 CCGTAACACTGAGTCCTCAGAGCCACCAAGATAACCCACAAG 42  
150 CCCTCATTTTCAGGCAGAGCCGCCGCCACCCTGAACAAAGTC 42  
151 TCAGAACCGCCACCACGATTGGCCTTGATAAAAACAGGGAAG 42  
152 ATAGGTGTATCACCGCCAGAATGGAAAACGTCAAAAATGAA 42  
153 GGATAAGTGCCGTCAAGCGTCATACATGTATTATTTATCCCA 42  
154 AGAGAAGGATTAGGAATAAGTTTTAACGTCTTTCCAGAGCCT 42  
155 TTATTCTGAAACATTATAAACAGTTAATCAGCTACAATTTTA 42  
156 CAATATAATCCTGAGTTAGAACCTACCAGGTTTTGAAGCCTT 42  
157 AATTATCATCATATAATAAAGAAATTGCTAAGAACGCGAGGC 42  
158 CATTATCATTTTGCATATACAGTAACAGCAATAGCAAGCAAA 42  
159 AATCCTTTGCCCGAGGATTCGCCTGATTGCAAGCCGTTTTTA 42  
160 TAGAAGTATTAGACCAGAGGCGAATTATAAGAACGGGTATTA 42  
161 CTAATAGATTAGAGTGATGAAACAAACAGTAGAAACCAATCA 42  
162 ATTGAGGAAGGTTACAATTTTCAATTTGAACCTGAACAAGAAA 42  
163 CAATCAATATCTGGAATCAATATATGTGCAGCTAATGCAGAA 42  
164 AATCTAAAGCATCACGCTATTAATTAATGTAAAGTAATTCTG 42  
165 CGCCTGCAACAGTGGATAGCTTAGATTATTTTCGAGCCAGTA 42  
166 CAGCAGAAGATAAATATCAAATCATAGCGCCATATTTAACA 42  
167 ATAGCCCTAAAACAGCTTAGGTTGGGTTTCAGTATAAAGCCAA 42  
168 ACAATATTTTTGAAATCCAATCGCAAGAAAAAGCCTGTTTA 42  
169 GGATGTAAATGCTGTTCCATATAACAGTTTAAATATGCAACT 42

|     |                                            |    |
|-----|--------------------------------------------|----|
| 170 | TTATATAACTATGAACGCATAACCGATACACCCTCAGCAGCG | 42 |
| 171 | AAAGTACGGTGTACTTTTGCGGGATCGTTATTCGGTCGCTGA | 42 |
| 172 | AGGATCCCCGGGTACCGGCTAGTACCCGTATA           | 32 |
| 173 | ATATTTTAGTTAATTCATCTTCTGACCTAAATTTAATGG    | 40 |
| 174 | TTTGAAATACCGACCGTGTGATAAATAAGGCGTTAAATAA   | 40 |

**Supporting Table 3. Staple list for the 24-helix bundle NR.**

| <b>Number</b> | <b>Sequence</b>                             | <b>Length</b> |
|---------------|---------------------------------------------|---------------|
| 1             | CGCCTGTAGCATAACAGCTCGGTTTATCAGCTTCACTACGGG  | 42            |
| 2             | TAAAGAACTTTTGGGAATTAGAGGAATTATCGCCTGGCCCTG  | 42            |
| 3             | AACATTATGACCAACAAGAAAGGCTATCAGGTCTCATCAAAA  | 42            |
| 4             | AAGCCCGAAAGATTGACCAGTTGATTCCCAATTAGCCTTTAA  | 42            |
| 5             | ACCTTATGCGATTTTGCCAAAACCAAAATAGCGTCGAGCTGG  | 42            |
| 6             | AAGTTTCCATTAGAACGGTGGAACCGAACTGACCCAGTCATT  | 42            |
| 7             | TAAGAAAACATGTAAATGCTGATTCCGGCTCAGTAGGGCTTA  | 42            |
| 8             | ATTTCTTACGTAGAAACCAATCAATAATATGATTAGTTGCTA  | 42            |
| 9             | AACCACCACAGTGCCGTCATTAGCGGGGTTTTAGCGTAAA    | 42            |
| 10            | TTTGCGGGACCCTGAACAAAGTCCGCATTATACGCAGTATGT  | 42            |
| 11            | ATAAATACCGTCAGTATTAACACCAGCAGAATTAGACTTTAC  | 42            |
| 12            | AATAGATAAATTTGCACGTAAAAAAGGGTTTTTCATTTGAAT  | 42            |
| 13            | CATTAATGAATCGGTGGTTTTTCTTTTCAC              | 30            |
| 14            | CAGAATGTTGATATTCACAAAGAGGTTGAG              | 30            |
| 15            | AGCCCGAGATAGCATTAAAGC                       | 21            |
| 16            | GTTCCAGTTTCATTGACAGCAAATAAATCCTGGTTGAGTGTT  | 42            |
| 17            | GCGGGGAGAGGGAAACCTGTC                       | 21            |
| 18            | TGAATTTACCGTTCAGTAAGCGTCATACA               | 30            |
| 19            | CAAAATCCCTTATAAATCAAAAGAAT                  | 26            |
| 20            | GGTCAGACGATTGGCCGAAAGCGCAGTCTC              | 30            |
| 21            | CGTTTGCCATCTTTTCATAATCACCAGCTG              | 30            |
| 22            | GTGAAATCACCGGAACCAGAGCCACC                  | 26            |
| 23            | GCTTTCAGTCGGCGGTTTTCGTCAACAGCTGCTCACTGCCC   | 42            |
| 24            | AGAGACGGGATTGGGCGCCAGGGCCAACGC              | 30            |
| 25            | AAATATTCCAATGAAACCAGGGCGACCACGCAATACACCACC  | 42            |
| 26            | AGTAGATAAAACCGGAGACAGTCATAGGTAAAGGGATTTAGA  | 42            |
| 27            | TCAACAACCGCACTCATCGACATGTTTTTAGTATCCAGGCTT  | 42            |
| 28            | GCGTACATTTTGATATTTAAATTGGCCCCAAGCAGAGGTGAG  | 42            |
| 29            | CATCGCCATCACCTTGCTTAGTCTTCTTGCAACAAATAAAC   | 42            |
| 30            | TCATAGGTTAGTTAATTTCCGCTGAGCTAGAAGATCAATGAC  | 42            |
| 31            | CGTTTTAGACAGATCGTAACCGTGGGGATAGAAACGCTCAAT  | 42            |
| 32            | TATGACGGGAGATAGAAAGGAACACAACCTTTCAAAGACTCCT | 42            |
| 33            | TACAGAGAAGCCCAATAATTTGTTTATCGCGTTTTGCACCCT  | 42            |
| 34            | CACCACCGTCACTAAACAGTTAATGGGTCAGCGATTGCCCTT  | 42            |
| 35            | ACAAATGAGTAGCTACCTTTTTAACCGCAATATTGAAACAAA  | 42            |
| 36            | CATCACCTTAATCTTCTGAATAATGGCAGAATAATTAGAGCC  | 42            |
| 37            | CCAGGCATGATTCCCTCAGAGCCACCCTCAGTACGACTTGAG  | 42            |
| 38            | GATTGTTCAAGTAACAGTACTATCAGAAAACTAATAAATAAA  | 42            |
| 39            | GTCAAACAATTTACCGAACGAACCACCGCCCCCAAAAACGCT  | 42            |
| 40            | CAATTGAAAATAGGTAATTGAGCGCTTACCAGAACGTAGAAA  | 42            |

41 ATTTAGAACGCGTCGGGCTGTCTTTCCTCCGGTAACCCAGCTA 42  
42 AAACAGTGAATTATCCAATCGCAAGATAATTACAATCGCCAT 42  
43 TCGTACATCAATAATAAAGAAATTGCTCATTTCTTTAATGG 42  
44 TTCACCTGATAGTGCAACAGTGCCACAAATATCTTCGACAAC 42  
45 CAGTGAGAGTAGTATTCATTAAAGGTCCAGGGGAACGGAATA 42  
46 CTGGTTTGCCCCATTTGCACCATTACCATTAGCCGATTACAT 42  
47 AAAGGTGGCAACAAGTAATATCAGAGAGATAACAAATTTATC 42  
48 CTGAATCTTACCCTTATTATCATTCCAAGAACGTGCAACAAC 42  
49 GCCAACATGTAAATCACAAAGAACGCGAGAAAAAATAGTACA 42  
50 TAAATCAATATATTATGTAGATTTTCAGGTTTAAATTTTAAA 42  
51 TCCTTTGCCCGATCTAGCTGAGAGCCAGCAGCACGAACAGTC 42  
52 ATACATGAGGGACAAAATCACCAGTATCGGTCAATTGCAGCAA 42  
53 CGGAAACAAAACCGTCAAGTTTGCCTTTAGCGTAAACGTCAA 42  
54 AGAATTGCCCAAATCTTACCGAAGCCCTTTTTAATTACGTGA 42  
55 TAAACCAAATCGGAGAATCATTACCGCGCCCAATAGCCGTAA 42  
56 CGACTTTGCTTCCCTGAACAAGAAAAATAACCTATGCGTTAT 42  
57 AGATGAAAAAGGAGCTGATTGCTTTGAATACCACCAAGGGAA 42  
58 AAAATCTCTGCGCGGGTCAGTTGGCAAATCAACAGGTGTAGC 42  
59 CCCAAGCAAAGGTAAAAACAGGGGAAGAGAGGCACGAACCTCC 42  
60 GTTTTCAGACGGAACGGCCCCCTGCCTATTTCCGCATAAGGT 42  
61 GATAGTTAGAATAAAAACTAAAGGAATTGCGAATCAGGCCTT 42  
62 AGATATATAGATAAGATCGCCTGATAAATTGTGTTATGTTTA 42  
63 ATAAATTTCTGAGAAACAGATACATAACGCCAATTGACAAAA 42  
64 CGCAGTATGGATTACTGCTGAATATAATGCTGTGAAGATCCT 42  
65 TGAGGAGATTA AAAATGAATCACCATCAATATGAAAGGTAAAA 42  
66 GGGGTGCTGTGCCTTGAGTAACAGTGCCAAAGTGTAACATGA 42  
67 TCTCCACCGATAAGCCTGTGTGAAATTGAGTGCAGGGAGTTA 42  
68 TTGTCAATCGTCTTAATAGTACCGAACCTATTATTCCGGAAT 42  
69 ACAAATTACGAAAGCGTATTCCGGTAATAATTTTTTATGACAA 42  
70 AAAGTAAAATCTACAGCCGGATATCGAAATCCGCGGCTGACC 42  
71 ATTAAAACGGAAGCCATAAATAAAGGAATTACGAAGACTGG 42  
72 GCGGATGAAAAATTGCGCGAGCTAGCTCAACATGTAATAACC 42  
73 GACCTCTGTAACAATTTAATCAGTATTCAACCGTTAACTAGC 42  
74 AACTATTGGGGCAACTGCAGGTCGACTCGGATCAATTCTACT 42  
75 ATTAACGGTTGAAATCACGACGTTGTAAAGAAACAGGAAGAT 42  
76 CGTTAAAATTCGCACCCGTCGGATTCCGGGGTAGAACCTTCT 42  
77 GTTTACCAGCGCAATCTATCAGGGCGATCGATTCAACAAGGC 42  
78 CAATCCAAATAAATCAAGTTTTTTGGGGCGACGTCAACCACA 42  
79 TGTCCAGACGACAGACCCTAAAGGGAGCCACAGCTAAGGTAT 42  
80 CATAGCGATAGCACCGGCGAACGTGGCGACAAGAGTCCTTTT 42  
81 TCAAATAGGAAAGCCGACCGTGTGATAAATAAGAATTAGAGC 42  
82 AGACAATATTTTCTTAACCACCACACCCTTTAATGCGAATGA 42  
83 AGGGCGAGTCATCGGCAGCAGGCGAAAAGACTCCACAAGAGT 42

84 ACCATCAAGCCGAACAATATAAAAGAAAGGCCCACTCATATG 42  
85 AGCACTAAGTAGAAGGAACGCTAACGAGTCGAGGTTTTATCC 42  
86 TTGACGGTACACCGGATTTAGGCAGAGGCCCCCGATGTAATTC 42  
87 GAAAGCGTAAGGCGAATGTGAGTGAATAAGAAAGGTTGAAAA 42  
88 TATAAAATTAATCAGAAAACGAGATTGAATCACTTATATAAC 42  
89 CAAAGAACCTACTAGAGCTTAATTTTTGATATTTACATTTAA 42  
90 CAACCCATCCTAAGATTTGTATCATTATACCTTGCCTTAAAT 42  
91 TTCCACAGCCAACAGTTTCAGCGGAGTGTTATCCGTTGAAAA 42  
92 GGTCATACTAAGCGCGAAACAAAGTACAGAATTCGGCTCCAT 42  
93 CGTATAACTCAGTTGAGATTTAGGAATAGCATGGCTAGTAAG 42  
94 CGAGGCAAGAGAGGTCATTTTTGCGGATTAGACCTAATATGC 42  
95 CCAAGCTGTAGATTCAAAGGGTGAGAAAACGACGCTGATAA 42  
96 GAGGACATAAAAAAAAAAGGCTCCAAATTCTCCGTAACACTGA 42  
97 ATTGCGTCTAATGACCCTCAGAACCGTGGTAATGAAAAGCCT 42  
98 CAGAACCCAACATAGGAACCCATGTAGTATGGGCGCTCACAA 42  
99 AAGGCCGGCTGTTTGGTAGCAACGGCATCTTTGCTTAATCAT 42  
100 AAAGCTGGGATCCCGTAAATTGGGCTCATTATTCATAGTACC 42  
101 TTTAAACAGTCCGCGACTATTATAGTGTACCTTTATTGATAG 42  
102 AATAGTATGCATGCAATTAAGCAATACAATGCCAGGCCAGTG 42  
103 TGTATAATTCCCAGATTTTTGTAAACGGCGGATCGTAACGC 42  
104 TTAACACCCTGCCGGAGAGGGTAGCTAATGAAGCCTCAGAGC 42  
105 ATAAATCATAAGTACGGTGTCTGGAAGAGACAGAAGCAAAGC 42  
106 GGGTAAAATATTAGCAAGTTTATTTTCATCAGGACAGATAAC 42  
107 ACCGGAACCGCCAAATCCCCCTTATTAGGTTTGATGGTGGGC 42  
108 CTCATTTTCAGGTACAAAACCGAGGAAAAAGACACCACGGCA 42  
109 CAGCAGCGAAAGGCGTTAAGAACGCGAGTTTCCAGAGCCTTC 42  
110 GCCCTGACGAGAGAGAAAAAGCCTGTTTTCCGAGCCAGTAGA 42  
111 CATAAATCAAATCTATACCTGAGCAAATGCTTCTGTAAACG 42  
112 TCATACAGGCAATGATAGGAGCACTAACAAGTTTGAGTAAAT 42  
113 GTTAATATTTTGTA AACCGCCAGCCATGGCCAACAGAGACC 42  
114 TTTCCCTCAGAGCCTGGCTTTTGATGAAGCTTCCGAAATCGG 42  
115 GCGATAGCAAGCCCTCCAGACGTTAGGCAGAATAAGTTTATT 42  
116 CAACAGCATCGGAAAAGGCAAAAAGAATCAAAAATTTGCCAGTT 42  
117 TAAACACCAGAACGGTTAATAAACGAAAAATAAGAGAATAT 42  
118 GCATCAGGTCTTTAAACTCCAACAGCAATTCGTCGCTATTA 42  
119 AAGGCAAAGAATTATTTAGAACCCCTCTAGACATTATCATTTT 42  
120 CAAATATCGATAGTTACAACAATAACGGATAGATTTAGTCTT 42  
121 CCTTCCTGTATCAA ACTATTAGTAATAACATCGCCATTCTGG 42  
122 AAGTAGGAGGTTTACGAGCCGGAAGCATCGAACCGCCACCCT 42  
123 TAATACTTTCCAGTTGAACCCCTCAATCAATTCTGGAGCACTG 42  
124 GTTACACAAGAATACGGGTACCGAGCTCACAAATCAACGTAAC 42  
125 AGCAAAATCGTCCTTAGCGACCGTATACCCCCCTCAAATGC 42  
126 CTTTGAAAGGTGACAATAACCGACAAAAGGCTCATTATACAA



|     |                                                                                             |    |
|-----|---------------------------------------------------------------------------------------------|----|
| 127 | GGCTTTTGCATTTAGATTTTTTCCCTTAGACGTTTTAATAGA                                                  | 42 |
| 128 | GTTTCCTCATTAAGAGGCTGAGACTCGTACCCACCCTCAGAG                                                  | 42 |
| 129 | ACCAACCTAATCGTATTGATACCGATAGTTTAACTACACGAT                                                  | 42 |
| 130 | ATTTCTTGTAGCCGGAACGAGGCGACTCTACAGAGGCTTT                                                    | 42 |
| 131 | GGATTGCGGCACTATCATAACCCTCGACAATGAGATGGTTTA                                                  | 42 |
| 132 | TTCGAGGTGCTGAAACGAATAAACAGCCATACGTAATGCGCT                                                  | 42 |
| 133 | GCGAACCCAGGTCATAAGAGGGGGTAATAGTAACTGAAGGACG                                                 | 42 |
| 134 | GCCTGAGAGATTGAATGGGAAAGCGTAAGAAGCCAGCTTATT                                                  | 42 |
| 135 | CAGAGCCGCCAGGAGTCTCAAGAGAAGGATCACCGTAGTCAC                                                  | 42 |
| 136 | CAGTACAAAATGAATTAGGAGCCTTTAATTGCCACGCTAAA                                                   | 42 |
| 137 | GACTTTTTCCCTAAAACCAGACGGTCAATCAGAGTAATAACTT                                                 | 42 |
| 138 | TAATCATTGTAACGGATTTACCAGACGACGAATACTGCATC                                                   | 42 |
| 139 | AAAAAGATTAGGATTAGTTTTATTCCATATTATATTTGCTAA                                                  | 42 |
| 140 | ATCGGTTGTTATTTAATTTTTGAGAGATCCATATGTCAATA                                                   | 42 |
| 141 | CGAACGAGTTCATATCCACAAAGAAACCATGCGGGAGACTG                                                   | 42 |
| 142 | ACAGACAGCAAAGAAAAGAAATAGCAATAGAATTTCTTATCC                                                  | 42 |
| 143 | CTAAAGTTTTATTAGGGAGAGGGTTGATATATACACCAGGCA                                                  | 42 |
| 144 | AGGTGTGAATCGATAGCAGCACCGTATAGTATAGCCTAAGTT                                                  | 42 |
| 145 | TTGGGAAGACAATAAGGTACAGACCAGGCGACAATGAAAGGC                                                  | 42 |
| 146 | CAACCAATTAAGAGCAAGAAACAATGTAGCCGACACAATTTT                                                  | 42 |
| 147 | AACGCAAGGAGCAACATTAGATACATTTTCGGTCAAGATCAAA                                                 | 42 |
| 148 | AATGTGAGCAATTACAGAATCGATGAACGGATAACCAATTTT                                                  | 42 |
| 149 | CAGTACCAGAGCAAAGACACAATCAATAGACCTCATAGTGCT                                                  | 42 |
| 150 | ATAGCACGAATCTTCTGACCTAAATTATAATGTTTGGACAGG                                                  | 42 |
| 151 | TTCATAACAAGAACAAGCAAGCCGTTTCATAGGCTGACACCCC                                                 | 42 |
| 152 | CGCCGCCAGGGCAGACTGATCAGTAGCGACGCGGATAAGAGC                                                  | 42 |
| 153 | ATGTCGAATGAACCTCAAATATCAAAGATCGTAACTTGAGT                                                   | 42 |
| 154 | TGTTTATATCTTTTACATCGGGAGAAAAAATGGTCTTTAATT                                                  | 42 |
| 155 | CATCAGTATAAATTCAGTGAATAATTACCCAGGATTTACGAG                                                  | 42 |
| 156 | ATTTACATTTGACATTAACATCCAAGGTGGCCTCATATCAAA                                                  | 42 |
| 157 | ACAGGTTTTGAATGCGGGATCGTCTGAGGCTAAATTAAGTGA                                                  | 42 |
| 158 | CAATAGGTTGGGATTCAACTAATGGATTCATCAGCCAACGCT                                                  | 42 |
| 159 | GGTCACGAAAAGGTTAACGTTATTAATTCTGGCAAAGGAGC                                                   | 42 |
| 160 | GCCGCTACGGGTAATAATAAAAGGGACAGCCGCGCGTGGCAC                                                  | 42 |
| 161 | GGAATTATCATCGCCGGGCGCTAGGGCGTTTGATGGCACGTC                                                  | 42 |
| 162 | AAGAACTGGTAGCGTTAATAATGGTTTGAAAAAAGAAGTTTT                                                  | 42 |
| 163 | TGCTGCAGCGAACGGTACGCC                                                                       | 21 |
| 164 | TTTCCTCTTTATAATCAGTGAGAACAATATTGGCAGA<br>GTATAACGTCTGTCCATCACAGGGCGTTGCCTGAGTAGAAGAACTACTTA | 37 |
| 165 | ATGC                                                                                        | 54 |
| 166 | CATGGTTACATTCAGGAGGCCGATTATGTTGTT                                                           | 33 |
| 167 | TTGCTCAGGAGCTAATCATCTGCCAGTTTGAGGGATG                                                       | 37 |
| 168 | CAGGGTTGCGTCACGTTGGTGTAGATGGAAGTTGGGGCCTCAGGAAGGCT                                          | 54 |

GGCG

|     |                                       |    |
|-----|---------------------------------------|----|
| 169 | ACACGACCAGTATCCAGGCCACCGAGTAAAAGAGTGC | 37 |
| 170 | TTGATAGCAATACTTCTTTGATCGCGATCGTATTGAC | 37 |
| 171 | AGAATCAGAGCGAATTAACCGTTGCGAGCAC       | 31 |
| 172 | AGAATCCTGAGAAGAAGGGATCTGAAATGGATT     | 33 |
| 173 | AAAGGGGGGACGACGACAGGTGCGGGCCTCT       | 31 |
| 174 | GCCAATCGCACTCCAGCCAGCCAAATCAGCTCATTTT | 37 |
| 175 | GGAACGCCAGTGGGAATTTCCGGCACCGCTCTATTAC | 37 |
| 176 | TCGTCTGGCAACTGTTGGGAATCCTCAACATTA     | 33 |
| 177 | GCAAAGCGCCATTCGGTTGCT                 | 21 |
| 178 | ATAATTCGCGTCAGGCTGCGTGCCGGAAACCAG     | 33 |

**Supporting Table 4. Staple list for the Nanorobot.**

| <b>Number</b> | <b>Sequence</b>                              | <b>Length</b> |
|---------------|----------------------------------------------|---------------|
| 1             | TTTAGTTAATTTCAATTAATTTTCCCTTTGAGTGA          | 35            |
| 2             | AGAAAACTTTTTCATTGAAAACATAGCG                 | 29            |
| 3             | AATCGCAAGACAAAAGATTAAGACGCTG                 | 28            |
| 4             | GTTATATTCATAGGTCTGAGACATCAAGAAAACAAATTTCAA   | 43            |
| 5             | TGAATTTTACATTTAACAATTTTCGCGCA                | 29            |
| 6             | ATAACCTCCTTTTACATCGGGTTTCAGGTTTAACGAAAAGTT   | 42            |
| 7             | ACAATATATGAGAATCCAATATAT                     | 24            |
| 8             | ATTCGCCAAATAAAGAAATTGATTTTGC                 | 28            |
| 9             | TGCATGGAAAATAGCTTGAACGCG                     | 24            |
| 10            | AAATCATTTGAGAAGAGCAAATCC                     | 25            |
| 11            | GAGGCGAGGTTAGAACCTACCATCATAT                 | 28            |
| 12            | TTACCTGTATACTTCTGAATATGATGGC                 | 28            |
| 13            | TGAGTAAACTCGTATTAATCCAGAGATACATCGCCATTA      | 40            |
| 14            | GGAACAAGACTTTACAAACAACCTGAAAGGCGCGAAAGATAAA  | 42            |
| 15            | GGAGCGGTTTGAGGATTTAGAGCACAGACAATAATCTCAATC   | 42            |
| 16            | TCCTGATGAGCCGTCAATAGACAGTTGGATCAAACAACAGTG   | 42            |
| 17            | AATTCATGCACTAACAACCTAAAAAGGAATCACCTTAGCAGCA  | 42            |
| 18            | TAAAGCATTGAGGATGCAACAGGAAAAATTGC             | 32            |
| 19            | AAAATACCGAACGAACCACCAGTGAGAATTAACCGTTGTAATTC | 44            |
| 20            | AGACTGATAGCCCTAAAAGAACCCAGTCACA              | 31            |
| 21            | ACAGAGGCCTGAGATTCTTTGATTAGTAATGG             | 32            |
| 22            | GCGTATTAGTCTTTAATCGTAAGAATTTACA              | 31            |
| 23            | TTAACACACAGGAACACTTGCCCTGAGTATTTG            | 32            |
| 24            | CCACGCTGGCCGATTCAAACCTATCGGCCCGCT            | 32            |
| 25            | GCCGCTGAACCTCAAATCAAATCAGGAAATA              | 31            |
| 26            | AATGAAACAGAGCGTAATATC                        | 22            |
| 27            | CGACCAGTCACGCAGCCACCGCTGGCAAAGCGAAAGAAC      | 39            |
| 28            | ACCTTCTGACTTCGACACATTATCCGTAGATAGAA          | 35            |
| 29            | TTGGCAGGCAATACAGTGTTTCTGCGCGGGCG             | 32            |
| 30            | ATTATACGTGAGTATTAAGAAACAAAACAGTGAT           | 35            |
| 31            | GTCTGAAATAACATCGGTACGGCCGCGCACGG             | 32            |
| 32            | ACGATCTGGTTAATACAAATTATCATATCAATACA          | 35            |
| 33            | CCTACATGAAGAACTAAAGGGCAGGGCGGAGCCCCGGGC      | 39            |
| 34            | CATACAGTTGTAGATTATATCAGAATGGAAGATTA          | 35            |
| 35            | TGGGGAGCTATTTGACGACTAAATACCATCAGTTT          | 35            |
| 36            | GGAAGAAGTGTAGCGGTCACGTTATAATCAGC             | 32            |
| 37            | AGAGAACGTGAATCAAATGCGTATTTCCAGTCCCC          | 35            |
| 38            | CGAACGTTAACCACCACACCCCCAGAATTGAG             | 32            |
| 39            | GGAAGGGCGAAAATCGGGTTTTTCGCGTTGCTCGT          | 35            |
| 40            | GAGCTTGTTAATGCGCCGCTAATTTTAGCGCCTGCCCTCAAT   | 42            |

|    |                                                 |    |
|----|-------------------------------------------------|----|
| 41 | CTAAAGGCGTACTATGGTTGCAACAGGAGAGA                | 32 |
| 42 | 42 core GCCGTAAAGCAGCACGTATAA                   | 29 |
| 43 | AAGTAGGGTTAACGCGCTGCCAGCGGCTAGTAGTCCGC          | 39 |
| 44 | GATTCCTGTTACGGGCAGTGAGCTTTTCTGAACGACG           | 38 |
| 45 | GCCTTCACCGAAAGCCTCCGCTCATTCCCAG                 | 31 |
| 46 | GTCCACGCTGCCCAAATCAAG                           | 21 |
| 47 | GGCGGTTAGAATAGCCCAGAGAAGTCCACTATTA AAAAGGAAG    | 42 |
| 48 | CAGGGTGCAAAATCCCTTATAGACTCCAACGTCAAAAGCCGG      | 42 |
| 49 | CAGTGAGTGATGGTGGTTCCGAAAACCGTCTATCACGATTTA      | 42 |
| 50 | ATTGCCCCAGCAGGCGAAAAGGCCACTACGTGACGGAACC        | 42 |
| 51 | AAATGCCAGTTTGAGGGGGATTGAGTGAGCGAATAGGA          | 38 |
| 52 | GGGTAGACCTTTGATAGATTAATCCGTAAT                  | 31 |
| 53 | CTCGAATGCTCACTACAGTAT                           | 21 |
| 54 | AATTGCATGCCTGCAGGACCCGTCGGATTTCAAATCAG          | 38 |
| 55 | GTCATGGTCATAGCTGAACTCACTCGCACT                  | 31 |
| 56 | TAATGTGAAATTGTTATGGGGTGCGGCACCG                 | 31 |
| 57 | TCACGACTGTGCTGGCGCAAC                           | 22 |
| 58 | AACGCCAGGGTTCAATTCCACACAACATACG                 | 31 |
| 59 | GGGATAGGTGCATCCCTGTCGGGGGAGA                    | 28 |
| 60 | AAACGGCGACGACGGCCCGCTGGGGCGC                    | 28 |
| 61 | CGGGCCTAGGAAGAATTAATTTTTTTCAC                   | 28 |
| 62 | TGTTGGGGCTTTCCCTAATGAACAGCTG                    | 28 |
| 63 | TCGCCATTGCCGAAAAGTGTCTGGCC                      | 28 |
| 64 | CGTAACCGTCACGTCAGCTTTAATTCGC                    | 28 |
| 65 | CCAGCCAAAGGGCGTGGCGAAAATTCGC                    | 28 |
| 66 | CTTCTGGTCAGGCTCAAGGCGTAAACGT                    | 28 |
| 67 | AATCATCAACCGAGGCAACCCGTATAAGGATCGGG             | 35 |
| 68 | ACGCCATGAACGGTAATCGTAGAGATCTACAAAGGTAAAAAT      | 42 |
| 69 | CTCATTTTCATGTCAATCATATGGAGAGGGTAGCTATATATTT     | 42 |
| 70 | ATTAAATGGTTGATAATCAGATCTAGCTGATAAATGAGTAAT      | 42 |
| 71 | TAATATTCAAAAACAGGAAGAATCAATATGATATTTCAAAAAG     | 42 |
| 72 | ATATTTAAATTGATTAAGTTGGGT                        | 25 |
| 73 | ACAAGAGGTCATTGCCTGAGAGCCTTTATTTCAACAATACTT      | 43 |
| 74 | TGAAAAC TAGTTTAACCAGTAACATCGACTCTACCGAG         | 38 |
| 75 | GCCGTACCCCTTTTGTTGCTATTACCAA                    | 28 |
| 76 | TTTTAGACCAAAAACATTATGCAATAAC                    | 28 |
| 77 | TAAATGCCATAAAGCTAAATCTTTCATTTGGGGCG             | 35 |
| 78 | GGTGAGACAAGGCAAAGAATT                           | 21 |
| 79 | AGCAAAATAAAGATCAACCGTAAAGCCCTTGTTAAAGGGGGAGTTG  | 46 |
| 80 | ATTTTCGCAAATGGTACCCTGTGCAAGGACTATCAGAATCGATCAAA | 46 |
| 81 | 81 core CTGTTTAGCTATATGGTTGTAACCCTCATTTT        | 40 |
| 82 | CGAGCTGCTCAGAGAATGCCTTAAT                       | 25 |
| 83 | TAGATTTAGTTTGAAACCAGAGCGTTTTAGGG                | 32 |

|     |                                                   |    |
|-----|---------------------------------------------------|----|
| 84  | CCATATATACCTTTCATCAAACCTGCGGACCCT                 | 32 |
| 85  | TTTTAAATGGCTTAGGTCTTCTTTAAACAAA                   | 32 |
| 86  | AGGGCCCGAATAGACTGTAAAAACAAATCTATCAT               | 35 |
| 87  | TAGAGAGACAGTTGATTCCCAATTCTGCCAAC                  | 33 |
| 88  | CCTTTTGCTGGAAGTTTCATT                             | 21 |
| 89  | TCAAAAATCAGAGCTTAATTG                             | 21 |
| 90  | GGTGCTTTTGCAGTCAGGATTTTAACAG                      | 28 |
| 91  | AAATGTTAGACTTCAAATATCCCGGAAGCAAACCTCGAACGAG       | 42 |
| 92  | TGAGTAAGAGCAGGTAGGAGTAGTCAAGAACAATC               | 35 |
| 93  | ACGACGAGATAGCGTCCAATAAAGATTAAGAGGAATCAGGAT        | 42 |
| 94  | CGTACTAACGATGGTTTCTTCATCTACTTAGGAGG               | 36 |
| 95  | ATCATAAATCGTCATAAATATAGCAAAGCGGATTGAATTGCT        | 42 |
| 96  | AGGCATAATCCCCCTCAAATGACCCTGACTATTATGTCATTT        | 42 |
| 97  | AGGTGAGATTCCTGACGCCAAATCTCGCCTGCGAT               | 35 |
| 98  | TACATAACGCCAGTTCAGAAA                             | 21 |
| 99  | CTTATGCGACGTTGGGAAGAACAAAATAGCGAGAGAATAGTA        | 42 |
| 100 | TGTCAGGCGCAGACGGTAGGCACCTGAGGAC                   | 31 |
| 101 | ACTTTAACGTTAATAAAACGATTACCAG                      | 28 |
| 102 | GCTTGAGGAACAACATTATTACAACACT                      | 28 |
| 103 | CCAGAACAAGATTCATCAGTAATTACG                       | 28 |
| 104 | GGCTTGCTAGGAATACCA                                | 18 |
| 105 | ATGCCGAACTAAATACGTGAGGAA                          | 24 |
| 106 | CGCACACTCAAAGACAGCATCGGAATATGACAACAACC            | 38 |
| 107 | AACGAAACCGGAACTTTTTCACGTTGAAGGGA                  | 32 |
| 108 | CAATAGCAACGGCTACATTTCCAGTGCTAAA                   | 31 |
| 109 | CACTAAAGACCTGCAAAAAAAGGCTCCGTTGCGCC               | 37 |
| 110 | CCCCAGATAAATTGCCTTTAATTGTATTTAA                   | 32 |
| 111 | TATGATCGTCACCCTCAACGCATAGCTTGATACCGATAAAAA        | 42 |
| 112 | TCATAATGCCACTACGACAATCATAAAGGAATTGCCGAACAAC       | 42 |
| 113 | TAAAGACACGATCTTTCAGCGGAGTGAG                      | 28 |
| 114 | GGCCGCTTCGCTGATCGAGGTGAATTTCCGGTTTATGTATCAAACGTAA | 49 |
| 115 | AGTAAAGTTTTACCAAGTACAAACGGATAAG                   | 31 |
| 116 | CAACTTTTAATAATGAGGCGC                             | 21 |
| 117 | GACATTTCTGTATAATCTCCTCCATGT                       | 27 |
| 118 | ACAACCGATACCACCCTCATTTTCGGAGGTT                   | 31 |
| 119 | AAAGGAACAACATAAGGAAAACGGTGTACAGACGAATTAC          | 40 |
| 120 | GGAGTGTCGACGGATATTCATTACAGAAACA                   | 32 |
| 121 | CATTAATGAACGAGGGAAGAATA                           | 24 |
| 122 | GAACCGCCACCCTCTCAGAAC                             | 22 |
| 123 | TGCCGTCAGAGGCTGAGACTCCAGAATGGAAAGCGGTTGAG         | 42 |
| 124 | GGGAGTTTTCGTGTCGTCGAGGCTTAACCTAA                  | 31 |
| 125 | AAGTATATTCTGAAACATGAACTGAATTTACCGTTCCGCCGCCAG     | 45 |
| 126 | TATCACCTGCCTATTTTCGGAAGCGTCATACATGGCCCACCAG       | 42 |

|     |                                                   |    |
|-----|---------------------------------------------------|----|
| 127 | TCAAGGGATAATCGCCCGCAGCGATCTTTGA                   | 32 |
| 128 | TAGTACCGTATAAACAGTTAAGATACAGGAGTGTAGAGCCAC        | 43 |
| 129 | CCCAGAGCCATATTCGGTTTGCGGACCAAGC                   | 31 |
| 130 | AAGCTCAAGAACCAGGCTACAACGTAGCGTATTTT               | 35 |
| 131 | GCAGGTCAACCGATTTGGGAAACCATTA                      | 28 |
| 132 | AACCACCCAATAATCAAAATCTATAAAA                      | 28 |
| 133 | CACCCTCCCAGAGCCCCTTATGACAGAA                      | 28 |
| 134 | AACCGCCCCTCCCTTCGGCATAGCGTCA                      | 28 |
| 135 | ATTACCAGAGCCAGTAACCTATTAGCCCGGAAACC               | 35 |
| 136 | GCAAGGCGAAACAATAGCCGAACAAAGTTATT                  | 32 |
| 137 | AACCCGACTTGAGCCATTGAGGGATCACAAT                   | 31 |
| 138 | ATGAAACTAAGCCCAGGAAACCGAGGAAAAAGACAAATT           | 39 |
| 139 | GATAAAGGTGAATTATCTGACGGACCACGGA                   | 31 |
| 140 | CCGTAATGATAACCAATAACGGAATACCGGCA                  | 32 |
| 141 | TCAAGTTATTGAGCACTGGCATGATTAAGAA                   | 33 |
| 142 | TTTTTTCGGTCATAGCCCACCACCACATACATAAAGGTCAAAAGAGCTA | 49 |
| 143 | CAATAGAAAGCAGATGAAATAAAACGATAGTT                  | 33 |
| 144 | TTGGGGAAGGGACAGGAGCAGTCTAGTATTAGAGA               | 36 |
| 145 | ATAAGTTTACCAGAAATAATACAAAAATCTTT                  | 32 |
| 146 | GAAACGCACGCAATCACAAGATTACAGACTTACCATTCTAAGCATT    | 46 |
| 147 | ACAACCGGAAAGAGCCGTTTTGATTGCCCCCGTAC               | 36 |
| 148 | AATGGAACCGACCCTCACTGGTAAAGTGCCCGCCA               | 35 |
| 149 | CAAACGTGACTCCTAAAGTCAGGAGAATATTA                  | 32 |
| 150 | GAAAAGTAAATTCAGACATTCAGACGATATTA                  | 32 |
| 151 | ATAAACAGGGAGCTACATAGCGAATAATCGGATAGATA            | 38 |
| 152 | AAATAAGGCAATAGCACCATTTTAGAGCCAGCAAAAAAGGGCTATGGTT | 49 |
| 153 | ACAGCCCAATGAACAAGCTGTCCACCAGTAACCGACCG            | 38 |
| 154 | ATTTGCCTTTTTGTTAACGTAGAGCAACGGA                   | 32 |
| 155 | CCAATATAGAACCAAGTACAACATTTAGGCACGTAAA             | 38 |
| 156 | CGAGCGTGAAAATAGCAGCCTATTGAGTCATC                  | 32 |
| 157 | CCTGAATGAGAATAACATAAATCAGAGACAGTAGCTAGCGTT        | 42 |
| 158 | TGCACCCAAGCGCATTAGACGGAGGGTATGCC                  | 32 |
| 159 | GTTGGAGGTTGAGCATGAAAATAA                          | 24 |
| 160 | ATCATTACCGCAAATAAACAGC                            | 22 |
| 161 | TCATCGAAGCAAGCAAATCAGGAGCCTA                      | 28 |
| 162 | GTATTAAAGGCTTATCCGGTAACGCTAA                      | 28 |
| 163 | CCAGAACGCGTTAACAAGGAATCA                          | 24 |
| 164 | TCCTTATAACGCGAGGCGTTTATTTTAT                      | 28 |
| 165 | CAATCAACCTCCCGACTTGCGGCTATTT                      | 28 |
| 166 | AAGGTAAAGTAATTCAAGCCG                             | 21 |
| 167 | TTTCGAGGACGACGACAATAAACCGCAC                      | 28 |
| 168 | ATGTAATGTTTCAGCTAATGCAAGAACGG                     | 29 |
| 169 | GCCATATCCTGTTTATCAACACTGTCTT                      | 28 |

|     |                                                       |    |
|-----|-------------------------------------------------------|----|
| 170 | AGTAGGGAGTCCTGAACAAGATAGAAAC                          | 28 |
| 171 | GGTTTGAAATATAAGAGAATAT                                | 22 |
| 172 | TGTGATAAATAAGGGAGGCAT                                 | 22 |
| 173 | TAAGAATAAACACCCGCCAAC                                 | 21 |
| 174 | TAATTACTAGAAAAGAGAATC                                 | 21 |
| 175 | TTCAATTAATATCAAAAACTATA                               | 24 |
| 176 | TTAGTATCATATGCGCTCAAC                                 | 21 |
| 177 | CTAAAGTACGGTGTATAAGAGAGTCAGATCAT                      | 32 |
| 178 | GTGTAGGTTAAGCAATAAAGCAAAAGGTGGCATCA                   | 35 |
| 179 | CAGTACATAAATCAATAACGGTTGTGCTACTCCAGTTC                | 39 |
| 180 | AATTACCTTTTTTATTTGAATTTGTGCTACTCCAGTTC                | 38 |
| 181 | CATTTTTGAATGGCGTCAGTATTGTGCTACTCCAGTTC                | 38 |
| 182 | GCCAGTGCGCCAGCATCGGTGTTGTGCTACTCCAGTTC                | 38 |
| 183 | CGGCCTCCTCTCCGTGGGAAC TTGTGCTACTCCAGTTC               | 38 |
| 184 | ATAGGCTGGCTGACAATTTTCATTGTGCTACTCCAGTTC               | 38 |
| 185 | AAGAGTAATCTTGAAAATTGGTTGTGCTACTCCAGTTC                | 38 |
| 186 | GCAAGCCCAATAGGATAGGTGTTGTGCTACTCCAGTTC                | 38 |
| 187 | CATTTAAATATACCGTCAGTCACCATTGTGCTACTCCAGTTC            | 42 |
| 188 | TGCCATCTTTTCTTAGCAGCATTGTGCTACTCCAGTTC                | 38 |
| 189 | ACCAAGTAATTATTTGCACGTACCAGAATTGTGCTACTCCAGTTC         | 45 |
| 190 | TTTACGTTAGGTACCGTAACACTGTTGATATTTGTGCTACTCCAGTTC      | 48 |
| 191 | CTTAATTAGCCTGTTGTAAATGCTGATGTCAATAGCATCATGG           | 43 |
| 192 | TTGCGGATATGCAAATTCTACTAATAGTGCTGACGT                  | 36 |
|     | TACTCAGCCCATTTGGGACCACAAT ATTTTTTTTTTTTTTTTTTTT       |    |
| 193 | TTAATGCTGTAGCTCAACATG                                 | 67 |
|     | TACTCAGCCCATTTGGGACCACAAT ATTTTTTTTTTTTTTTTTTTT       |    |
| 194 | TTAACCTCCGGCTTAGGTTGG                                 | 67 |
|     | CCAACGTTATACAAATCTTATAACAGGGTCGCCCATCGGTTCGAATCAGAC   |    |
| 195 | GGTTTAAGGCAGT                                         | 65 |
|     | AGTAGCATTAAACATCCAATTAATCAGGGCACTGCAAGCAATTGTGGTCCCAA |    |
| 196 | TGGGCTGAGTA                                           | 63 |
| 197 | CTTAATTAGCCTGTTGTAAATGCTGATGTCAATAGCATCATGG           | 43 |
| 198 | TTGCGGATATGCAAATTCTACTAATAGTGCTGACGT                  | 36 |
